# Supplementary material for: Apparent size and morphology of bacterial microcompartments varies with technique
Source: bioRxiv preprint, doi:10.1101/864074, version 1 (2019-12-05)
Supplement: S3_File [file 864074_file05.xlsx]

## Sheet: Copy of MCPs TMDS004 1 to 500
NTA Single Analysis Summary File
Created with NTA 3.4 Build 3.4.003
[Experiment Details]
Software Version	NTA 3.4 Build 3.4.003
Experiment Name	mcps TMDS004 1 to 500 mcp buffer-210s 2019-07-17 17-37-58 2019-07-17 17-56-56.nano
Operator Name	jmh
Time Captured	17:56:56 17/07/2019
Sample Description	tmds004
Pre-treatment
Diluent
Remarks	1 to 500-longer exposure
Filename:	mcps TMDS004 1 to 500 mcp buffer-210s 2019-07-17 17-37-58 2019-07-17 17-57-37
Processed	Yes
[Conditions]
Temperature/C	22.319
Viscosity/cP	0.945762
Camera Type	sCMOS
Laser Type	Blue488
Camera Level	13
Slider Shutter	1232
Slider Gain	219
Shutter/ms	30.8
Camera Histogram Upper Limit	8235
Camera Histogram Lower Limit	0
Frame rate/fps	24.9825
Syringe Pump Speed/AU	30
[Settings]
Detection Threshold	7
Max Jump Mode	Auto
Max Jump Distance	12.5471
Blur	Auto
Min Track Length	Auto
First frame	0
Total frames analysed	5246
[Exclusion Regions]
No Exclusion Regions Used
[Results]
Dilution factor (concentrations adjusted for this factor)	Not recorded
Concentration (Particles / ml)	2890000000
Particles per frame	157.7
Centres per frame	138.7
Completed tracks	69105
X-Drift (pix/frame)	-4.4
Y-Drift (pix/frame)	0
[Information]
Completed Tracks	OK
Concentration	OK
Video length	OK
Noise level	No
Vibration detected	No
Vibration correction applied	No
Settings changed?	No
Errors (1)
Errors (2)
[Data Included]
Size distribution - Number weighting - With Percentiles
Size distribution - Surface area weighting - With Percentiles
Size distribution - Volume weighting - With Percentiles
Diffusion distribution - Number weighting - With Percentiles
Diffusion distribution - Surface area weighting - With Percentiles
Diffusion distribution - Volume weighting - With Percentiles
[Size Data]
Analysis Method	FTLA
Weighting	Number
Filename	mcps TMDS004 1 to 500 mcp buffer-210s 2019-07-17 17-37-58 2019-07-17 17-57-37
Mean	147.2
Mode	133.2
SD	33.3
D10	122.5
D50	137.2
D90	190
Valid Tracks	23832
Graph Data
Bin centre (nm)	Concentration (particles / ml)
0.5	0
1.5	0
2.5	0
3.5	0
4.5	0
5.5	0
6.5	0
7.5	0
8.5	0
9.5	0
10.5	0
11.5	0
12.5	0
13.5	0
14.5	0
15.5	0
16.5	0
17.5	0
18.5	0
19.5	0
20.5	0
21.5	0
22.5	0
23.5	0
24.5	0
25.5	0
26.5	0
27.5	0
28.5	0
29.5	0
30.5	0
31.5	0
32.5	0
33.5	0
34.5	0
35.5	0
36.5	0
37.5	0
38.5	0
39.5	0
40.5	0
41.5	0
42.5	0
43.5	0
44.5	0
45.5	0
46.5	0
47.5	0
48.5	0
49.5	0
50.5	0
51.5	0
52.5	0
53.5	0
54.5	0
55.5	0
56.5	0
57.5	0
58.5	0
59.5	0
60.5	0
61.5	0
62.5	0
63.5	0
64.5	0
65.5	0
66.5	0
67.5	0
68.5	0
69.5	0
70.5	0
71.5	0
72.5	0
73.5	0
74.5	0
75.5	0
76.5	2
77.5	4
78.5	8
79.5	16
80.5	32
81.5	62
82.5	117
83.5	215
84.5	385
85.5	672
86.5	1149
87.5	1920
88.5	3144
89.5	5048
90.5	7962
91.5	12349
92.5	18855
93.5	28374
94.5	42125
95.5	61761
96.5	89489
97.5	128241
98.5	181854
99.5	255304
100.5	354964
101.5	488885
102.5	667103
103.5	901950
104.5	1208340
105.5	1604024
106.5	2109773
107.5	2749462
108.5	3550021
109.5	4541225
110.5	5755281
111.5	7226201
112.5	8988903
113.5	11078037
114.5	13526491
115.5	16363567
116.5	19612813
117.5	23289542
118.5	27398078
119.5	31928852
120.5	36855517
121.5	42132336
122.5	47692159
123.5	53445359
124.5	59280121
125.5	65064424
126.5	70649960
127.5	75878047
128.5	80587366
129.5	84623057
130.5	87846479
131.5	90144691
132.5	91438680
133.5	91689358
134.5	90900595
135.5	89118883
136.5	86429642
137.5	82950598
138.5	78823003
139.5	74201711
140.5	69245168
141.5	64106272
142.5	58924846
143.5	53822189
144.5	48897826
145.5	44228353
146.5	39868038
147.5	35850764
148.5	32192821
149.5	28896131
150.5	25951547
151.5	23341936
152.5	21044912
153.5	19035095
154.5	17285905
155.5	15770897
156.5	14464701
157.5	13343630
158.5	12386031
159.5	11572425
160.5	10885518
161.5	10310112
162.5	9832944
163.5	9442507
164.5	9128840
165.5	8883324
166.5	8698482
167.5	8567785
168.5	8485479
169.5	8446423
170.5	8445943
171.5	8479705
172.5	8543607
173.5	8633682
174.5	8746028
175.5	8876749
176.5	9021919
177.5	9177565
178.5	9339670
179.5	9504187
180.5	9667078
181.5	9824354
182.5	9972143
183.5	10106744
184.5	10224696
185.5	10322845
186.5	10398400
187.5	10448982
188.5	10472664
189.5	10467996
190.5	10434016
191.5	10370246
192.5	10276677
193.5	10153742
194.5	10002281
195.5	9823493
196.5	9618896
197.5	9390269
198.5	9139610
199.5	8869084
200.5	8580977
201.5	8277658
202.5	7961542
203.5	7635051
204.5	7300595
205.5	6960536
206.5	6617175
207.5	6272726
208.5	5929302
209.5	5588898
210.5	5253378
211.5	4924461
212.5	4603710
213.5	4292523
214.5	3992125
215.5	3703563
216.5	3427702
217.5	3165224
218.5	2916632
219.5	2682254
220.5	2462249
221.5	2256623
222.5	2065236
223.5	1887821
224.5	1723996
225.5	1573285
226.5	1435136
227.5	1308932
228.5	1194015
229.5	1089699
230.5	995281
231.5	910059
232.5	833341
233.5	764452
234.5	702744
235.5	647603
236.5	598448
237.5	554740
238.5	515978
239.5	481705
240.5	451503
241.5	424997
242.5	401846
243.5	381751
244.5	364446
245.5	349697
246.5	337302
247.5	327088
248.5	318909
249.5	312643
250.5	308192
251.5	305478
252.5	304444
253.5	305051
254.5	307278
255.5	311119
256.5	316582
257.5	323688
258.5	332470
259.5	342972
260.5	355243
261.5	369340
262.5	385323
263.5	403253
264.5	423185
265.5	445171
266.5	469247
267.5	495437
268.5	523738
269.5	554122
270.5	586525
271.5	620844
272.5	656927
273.5	694573
274.5	733521
275.5	773452
276.5	813986
277.5	854682
278.5	895042
279.5	934515
280.5	972512
281.5	1008411
282.5	1041575
283.5	1071374
284.5	1097194
285.5	1118466
286.5	1134684
287.5	1145421
288.5	1150349
289.5	1149255
290.5	1142044
291.5	1128753
292.5	1109546
293.5	1084708
294.5	1054642
295.5	1019847
296.5	980905
297.5	938460
298.5	893195
299.5	845812
300.5	797009
301.5	747459
302.5	697797
303.5	648604
304.5	600396
305.5	553616
306.5	508635
307.5	465746
308.5	425169
309.5	387056
310.5	351495
311.5	318520
312.5	288115
313.5	260225
314.5	234765
315.5	211624
316.5	190672
317.5	171771
318.5	154773
319.5	139530
320.5	125896
321.5	113727
322.5	102886
323.5	93245
324.5	84683
325.5	77089
326.5	70360
327.5	64403
328.5	59135
329.5	54479
330.5	50368
331.5	46742
332.5	43546
333.5	40734
334.5	38263
335.5	36098
336.5	34205
337.5	32557
338.5	31129
339.5	29900
340.5	28851
341.5	27967
342.5	27234
343.5	26641
344.5	26176
345.5	25833
346.5	25604
347.5	25483
348.5	25466
349.5	25548
350.5	25727
351.5	26001
352.5	26367
353.5	26825
354.5	27373
355.5	28012
356.5	28739
357.5	29556
358.5	30461
359.5	31454
360.5	32534
361.5	33699
362.5	34947
363.5	36277
364.5	37684
365.5	39164
366.5	40713
367.5	42323
368.5	43987
369.5	45697
370.5	47443
371.5	49213
372.5	50995
373.5	52775
374.5	54540
375.5	56274
376.5	57961
377.5	59584
378.5	61126
379.5	62573
380.5	63907
381.5	65113
382.5	66177
383.5	67086
384.5	67829
385.5	68397
386.5	68782
387.5	68981
388.5	68989
389.5	68808
390.5	68440
391.5	67890
392.5	67164
393.5	66272
394.5	65225
395.5	64035
396.5	62716
397.5	61283
398.5	59751
399.5	58137
400.5	56456
401.5	54723
402.5	52955
403.5	51165
404.5	49367
405.5	47575
406.5	45800
407.5	44052
408.5	42341
409.5	40675
410.5	39061
411.5	37505
412.5	36012
413.5	34585
414.5	33228
415.5	31942
416.5	30728
417.5	29589
418.5	28522
419.5	27529
420.5	26609
421.5	25760
422.5	24982
423.5	24274
424.5	23633
425.5	23059
426.5	22550
427.5	22106
428.5	21724
429.5	21405
430.5	21146
431.5	20948
432.5	20811
433.5	20733
434.5	20716
435.5	20759
436.5	20864
437.5	21030
438.5	21261
439.5	21556
440.5	21918
441.5	22350
442.5	22853
443.5	23431
444.5	24085
445.5	24821
446.5	25641
447.5	26548
448.5	27547
449.5	28642
450.5	29836
451.5	31132
452.5	32536
453.5	34049
454.5	35674
455.5	37413
456.5	39268
457.5	41238
458.5	43322
459.5	45516
460.5	47817
461.5	50217
462.5	52707
463.5	55274
464.5	57905
465.5	60580
466.5	63279
467.5	65977
468.5	68647
469.5	71258
470.5	73776
471.5	76164
472.5	78384
473.5	80397
474.5	82163
475.5	83641
476.5	84795
477.5	85588
478.5	85989
479.5	85972
480.5	85516
481.5	84609
482.5	83245
483.5	81429
484.5	79175
485.5	76504
486.5	73447
487.5	70045
488.5	66345
489.5	62399
490.5	58265
491.5	54003
492.5	49676
493.5	45343
494.5	41062
495.5	36887
496.5	32866
497.5	29041
498.5	25445
499.5	22104
500.5	19036
501.5	16250
502.5	13749
503.5	11529
504.5	9580
505.5	7889
506.5	6436
507.5	5203
508.5	4167
509.5	3306
510.5	2599
511.5	2024
512.5	1561
513.5	1193
514.5	903
515.5	677
516.5	503
517.5	370
518.5	270
519.5	195
520.5	139
521.5	99
522.5	69
523.5	48
524.5	33
525.5	23
526.5	15
527.5	10
528.5	7
529.5	5
530.5	3
531.5	2
532.5	1
533.5	0
534.5	0
535.5	0
536.5	0
537.5	0
538.5	0
539.5	0
540.5	0
541.5	0
542.5	0
543.5	0
544.5	0
545.5	0
546.5	0
547.5	0
548.5	0
549.5	0
550.5	0
551.5	0
552.5	0
553.5	0
554.5	0
555.5	0
556.5	0
557.5	0
558.5	0
559.5	0
560.5	0
561.5	0
562.5	0
563.5	0
564.5	0
565.5	0
566.5	0
567.5	0
568.5	0
569.5	0
570.5	0
571.5	0
572.5	0
573.5	0
574.5	0
575.5	0
576.5	0
577.5	0
578.5	0
579.5	0
580.5	0
581.5	0
582.5	0
583.5	0
584.5	0
585.5	0
586.5	0
587.5	0
588.5	0
589.5	0
590.5	0
591.5	0
592.5	0
593.5	0
594.5	0
595.5	0
596.5	0
597.5	0
598.5	0
599.5	0
600.5	0
601.5	0
602.5	0
603.5	0
604.5	0
605.5	0
606.5	0
607.5	0
608.5	0
609.5	0
610.5	0
611.5	0
612.5	0
613.5	0
614.5	0
615.5	0
616.5	0
617.5	0
618.5	0
619.5	0
620.5	0
621.5	0
622.5	0
623.5	0
624.5	0
625.5	0
626.5	0
627.5	0
628.5	0
629.5	0
630.5	0
631.5	0
632.5	0
633.5	0
634.5	0
635.5	0
636.5	0
637.5	0
638.5	0
639.5	0
640.5	0
641.5	0
642.5	0
643.5	0
644.5	0
645.5	0
646.5	0
647.5	0
648.5	0
649.5	0
650.5	0
651.5	0
652.5	0
653.5	0
654.5	0
655.5	0
656.5	0
657.5	0
658.5	0
659.5	0
660.5	0
661.5	0
662.5	0
663.5	0
664.5	0
665.5	0
666.5	0
667.5	0
668.5	0
669.5	0
670.5	0
671.5	0
672.5	0
673.5	0
674.5	0
675.5	0
676.5	0
677.5	0
678.5	0
679.5	0
680.5	0
681.5	0
682.5	0
683.5	0
684.5	0
685.5	0
686.5	0
687.5	0
688.5	0
689.5	0
690.5	0
691.5	0
692.5	0
693.5	0
694.5	0
695.5	0
696.5	0
697.5	0
698.5	0
699.5	0
700.5	0
701.5	0
702.5	0
703.5	0
704.5	0
705.5	0
706.5	0
707.5	0
708.5	0
709.5	0
710.5	0
711.5	0
712.5	0
713.5	0
714.5	0
715.5	0
716.5	0
717.5	0
718.5	0
719.5	0
720.5	0
721.5	0
722.5	0
723.5	0
724.5	0
725.5	0
726.5	0
727.5	0
728.5	0
729.5	0
730.5	0
731.5	0
732.5	0
733.5	0
734.5	0
735.5	0
736.5	0
737.5	0
738.5	0
739.5	0
740.5	0
741.5	0
742.5	0
743.5	0
744.5	0
745.5	0
746.5	0
747.5	0
748.5	0
749.5	0
750.5	0
751.5	0
752.5	0
753.5	0
754.5	0
755.5	0
756.5	0
757.5	0
758.5	0
759.5	0
760.5	0
761.5	0
762.5	0
763.5	0
764.5	0
765.5	0
766.5	0
767.5	0
768.5	0
769.5	0
770.5	0
771.5	0
772.5	0
773.5	0
774.5	0
775.5	0
776.5	0
777.5	0
778.5	0
779.5	0
780.5	0
781.5	0
782.5	0
783.5	0
784.5	0
785.5	0
786.5	0
787.5	0
788.5	0
789.5	0
790.5	0
791.5	0
792.5	0
793.5	0
794.5	0
795.5	0
796.5	0
797.5	0
798.5	0
799.5	0
800.5	0
801.5	0
802.5	0
803.5	0
804.5	0
805.5	0
806.5	0
807.5	0
808.5	0
809.5	0
810.5	0
811.5	0
812.5	0
813.5	0
814.5	0
815.5	0
816.5	0
817.5	0
818.5	0
819.5	0
820.5	0
821.5	0
822.5	0
823.5	0
824.5	0
825.5	0
826.5	0
827.5	0
828.5	0
829.5	0
830.5	0
831.5	0
832.5	0
833.5	0
834.5	0
835.5	0
836.5	0
837.5	0
838.5	0
839.5	0
840.5	0
841.5	0
842.5	0
843.5	0
844.5	0
845.5	0
846.5	0
847.5	0
848.5	0
849.5	0
850.5	0
851.5	0
852.5	0
853.5	0
854.5	0
855.5	0
856.5	0
857.5	0
858.5	0
859.5	0
860.5	0
861.5	0
862.5	0
863.5	0
864.5	0
865.5	0
866.5	0
867.5	0
868.5	0
869.5	0
870.5	0
871.5	0
872.5	0
873.5	0
874.5	0
875.5	0
876.5	0
877.5	0
878.5	0
879.5	0
880.5	0
881.5	0
882.5	0
883.5	0
884.5	0
885.5	0
886.5	0
887.5	0
888.5	0
889.5	0
890.5	0
891.5	0
892.5	0
893.5	0
894.5	0
895.5	0
896.5	0
897.5	0
898.5	0
899.5	0
900.5	0
901.5	0
902.5	0
903.5	0
904.5	0
905.5	0
906.5	0
907.5	0
908.5	0
909.5	0
910.5	0
911.5	0
912.5	0
913.5	0
914.5	0
915.5	0
916.5	0
917.5	0
918.5	0
919.5	0
920.5	0
921.5	0
922.5	0
923.5	0
924.5	0
925.5	0
926.5	0
927.5	0
928.5	0
929.5	0
930.5	0
931.5	0
932.5	0
933.5	0
934.5	0
935.5	0
936.5	0
937.5	0
938.5	0
939.5	0
940.5	0
941.5	0
942.5	0
943.5	0
944.5	0
945.5	0
946.5	0
947.5	0
948.5	0
949.5	0
950.5	0
951.5	0
952.5	0
953.5	0
954.5	0
955.5	0
956.5	0
957.5	0
958.5	0
959.5	0
960.5	0
961.5	0
962.5	0
963.5	0
964.5	0
965.5	0
966.5	0
967.5	0
968.5	0
969.5	0
970.5	0
971.5	0
972.5	0
973.5	0
974.5	0
975.5	0
976.5	0
977.5	0
978.5	0
979.5	0
980.5	0
981.5	0
982.5	0
983.5	0
984.5	0
985.5	0
986.5	0
987.5	0
988.5	0
989.5	0
990.5	0
991.5	0
992.5	0
993.5	0
994.5	0
995.5	0
996.5	0
997.5	0
998.5	0
999.5	0
1000.5	0
1001.5	0
1002.5	0
1003.5	0
1004.5	0
1005.5	0
1006.5	0
1007.5	0
1008.5	0
1009.5	0
1010.5	0
1011.5	0
1012.5	0
1013.5	0
1014.5	0
1015.5	0
1016.5	0
1017.5	0
1018.5	0
1019.5	0
1020.5	0
1021.5	0
1022.5	0
1023.5	0
1024.5	0
1025.5	0
1026.5	0
1027.5	0
1028.5	0
1029.5	0
1030.5	0
1031.5	0
1032.5	0
1033.5	0
1034.5	0
1035.5	0
1036.5	0
1037.5	0
1038.5	0
1039.5	0
1040.5	0
1041.5	0
1042.5	0
1043.5	0
1044.5	0
1045.5	0
1046.5	0
1047.5	0
1048.5	0
1049.5	0
1050.5	0
1051.5	0
1052.5	0
1053.5	0
1054.5	0
1055.5	0
1056.5	0
1057.5	0
1058.5	0
1059.5	0
1060.5	0
1061.5	0
1062.5	0
1063.5	0
1064.5	0
1065.5	0
1066.5	0
1067.5	0
1068.5	0
1069.5	0
1070.5	0
1071.5	0
1072.5	0
1073.5	0
1074.5	0
1075.5	0
1076.5	0
1077.5	0
1078.5	0
1079.5	0
1080.5	0
1081.5	0
1082.5	0
1083.5	0
1084.5	0
1085.5	0
1086.5	0
1087.5	0
1088.5	0
1089.5	0
1090.5	0
1091.5	0
1092.5	0
1093.5	0
1094.5	0
1095.5	0
1096.5	0
1097.5	0
1098.5	0
1099.5	0
1100.5	0
1101.5	0
1102.5	0
1103.5	0
1104.5	0
1105.5	0
1106.5	0
1107.5	0
1108.5	0
1109.5	0
1110.5	0
1111.5	0
1112.5	0
1113.5	0
1114.5	0
1115.5	0
1116.5	0
1117.5	0
1118.5	0
1119.5	0
1120.5	0
1121.5	0
1122.5	0
1123.5	0
1124.5	0
1125.5	0
1126.5	0
1127.5	0
1128.5	0
1129.5	0
1130.5	0
1131.5	0
1132.5	0
1133.5	0
1134.5	0
1135.5	0
1136.5	0
1137.5	0
1138.5	0
1139.5	0
1140.5	0
1141.5	0
1142.5	0
1143.5	0
1144.5	0
1145.5	0
1146.5	0
1147.5	0
1148.5	0
1149.5	0
1150.5	0
1151.5	0
1152.5	0
1153.5	0
1154.5	0
1155.5	0
1156.5	0
1157.5	0
1158.5	0
1159.5	0
1160.5	0
1161.5	0
1162.5	0
1163.5	0
1164.5	0
1165.5	0
1166.5	0
1167.5	0
1168.5	0
1169.5	0
1170.5	0
1171.5	0
1172.5	0
1173.5	0
1174.5	0
1175.5	0
1176.5	0
1177.5	0
1178.5	0
1179.5	0
1180.5	0
1181.5	0
1182.5	0
1183.5	0
1184.5	0
1185.5	0
1186.5	0
1187.5	0
1188.5	0
1189.5	0
1190.5	0
1191.5	0
1192.5	0
1193.5	0
1194.5	0
1195.5	0
1196.5	0
1197.5	0
1198.5	0
1199.5	0
1200.5	0
1201.5	0
1202.5	0
1203.5	0
1204.5	0
1205.5	0
1206.5	0
1207.5	0
1208.5	0
1209.5	0
1210.5	0
1211.5	0
1212.5	0
1213.5	0
1214.5	0
1215.5	0
1216.5	0
1217.5	0
1218.5	0
1219.5	0
1220.5	0
1221.5	0
1222.5	0
1223.5	0
1224.5	0
1225.5	0
1226.5	0
1227.5	0
1228.5	0
1229.5	0
1230.5	0
1231.5	0
1232.5	0
1233.5	0
1234.5	0
1235.5	0
1236.5	0
1237.5	0
1238.5	0
1239.5	0
1240.5	0
1241.5	0
1242.5	0
1243.5	0
1244.5	0
1245.5	0
1246.5	0
1247.5	0
1248.5	0
1249.5	0
1250.5	0
1251.5	0
1252.5	0
1253.5	0
1254.5	0
1255.5	0
1256.5	0
1257.5	0
1258.5	0
1259.5	0
1260.5	0
1261.5	0
1262.5	0
1263.5	0
1264.5	0
1265.5	0
1266.5	0
1267.5	0
1268.5	0
1269.5	0
1270.5	0
1271.5	0
1272.5	0
1273.5	0
1274.5	0
1275.5	0
1276.5	0
1277.5	0
1278.5	0
1279.5	0
1280.5	0
1281.5	0
1282.5	0
1283.5	0
1284.5	0
1285.5	0
1286.5	0
1287.5	0
1288.5	0
1289.5	0
1290.5	0
1291.5	0
1292.5	0
1293.5	0
1294.5	0
1295.5	0
1296.5	0
1297.5	0
1298.5	0
1299.5	0
1300.5	0
1301.5	0
1302.5	0
1303.5	0
1304.5	0
1305.5	0
1306.5	0
1307.5	0
1308.5	0
1309.5	0
1310.5	0
1311.5	0
1312.5	0
1313.5	0
1314.5	0
1315.5	0
1316.5	0
1317.5	0
1318.5	0
1319.5	0
1320.5	0
1321.5	0
1322.5	0
1323.5	0
1324.5	0
1325.5	0
1326.5	0
1327.5	0
1328.5	0
1329.5	0
1330.5	0
1331.5	0
1332.5	0
1333.5	0
1334.5	0
1335.5	0
1336.5	0
1337.5	0
1338.5	0
1339.5	0
1340.5	0
1341.5	0
1342.5	0
1343.5	0
1344.5	0
1345.5	0
1346.5	0
1347.5	0
1348.5	0
1349.5	0
1350.5	0
1351.5	0
1352.5	0
1353.5	0
1354.5	0
1355.5	0
1356.5	0
1357.5	0
1358.5	0
1359.5	0
1360.5	0
1361.5	0
1362.5	0
1363.5	0
1364.5	0
1365.5	0
1366.5	0
1367.5	0
1368.5	0
1369.5	0
1370.5	0
1371.5	0
1372.5	0
1373.5	0
1374.5	0
1375.5	0
1376.5	0
1377.5	0
1378.5	0
1379.5	0
1380.5	0
1381.5	0
1382.5	0
1383.5	0
1384.5	0
1385.5	0
1386.5	0
1387.5	0
1388.5	0
1389.5	0
1390.5	0
1391.5	0
1392.5	0
1393.5	0
1394.5	0
1395.5	0
1396.5	0
1397.5	0
1398.5	0
1399.5	0
1400.5	0
1401.5	0
1402.5	0
1403.5	0
1404.5	0
1405.5	0
1406.5	0
1407.5	0
1408.5	0
1409.5	0
1410.5	0
1411.5	0
1412.5	0
1413.5	0
1414.5	0
1415.5	0
1416.5	0
1417.5	0
1418.5	0
1419.5	0
1420.5	0
1421.5	0
1422.5	0
1423.5	0
1424.5	0
1425.5	0
1426.5	0
1427.5	0
1428.5	0
1429.5	0
1430.5	0
1431.5	0
1432.5	0
1433.5	0
1434.5	0
1435.5	0
1436.5	0
1437.5	0
1438.5	0
1439.5	0
1440.5	0
1441.5	0
1442.5	0
1443.5	0
1444.5	0
1445.5	0
1446.5	0
1447.5	0
1448.5	0
1449.5	0
1450.5	0
1451.5	0
1452.5	0
1453.5	0
1454.5	0
1455.5	0
1456.5	0
1457.5	0
1458.5	0
1459.5	0
1460.5	0
1461.5	0
1462.5	0
1463.5	0
1464.5	0
1465.5	0
1466.5	0
1467.5	0
1468.5	0
1469.5	0
1470.5	0
1471.5	0
1472.5	0
1473.5	0
1474.5	0
1475.5	0
1476.5	0
1477.5	0
1478.5	0
1479.5	0
1480.5	0
1481.5	0
1482.5	0
1483.5	0
1484.5	0
1485.5	0
1486.5	0
1487.5	0
1488.5	0
1489.5	0
1490.5	0
1491.5	0
1492.5	0
1493.5	0
1494.5	0
1495.5	0
1496.5	0
1497.5	0
1498.5	0
1499.5	0
1500.5	0
1501.5	0
1502.5	0
1503.5	0
1504.5	0
1505.5	0
1506.5	0
1507.5	0
1508.5	0
1509.5	0
1510.5	0
1511.5	0
1512.5	0
1513.5	0
1514.5	0
1515.5	0
1516.5	0
1517.5	0
1518.5	0
1519.5	0
1520.5	0
1521.5	0
1522.5	0
1523.5	0
1524.5	0
1525.5	0
1526.5	0
1527.5	0
1528.5	0
1529.5	0
1530.5	0
1531.5	0
1532.5	0
1533.5	0
1534.5	0
1535.5	0
1536.5	0
1537.5	0
1538.5	0
1539.5	0
1540.5	0
1541.5	0
1542.5	0
1543.5	0
1544.5	0
1545.5	0
1546.5	0
1547.5	0
1548.5	0
1549.5	0
1550.5	0
1551.5	0
1552.5	0
1553.5	0
1554.5	0
1555.5	0
1556.5	0
1557.5	0
1558.5	0
1559.5	0
1560.5	0
1561.5	0
1562.5	0
1563.5	0
1564.5	0
1565.5	0
1566.5	0
1567.5	0
1568.5	0
1569.5	0
1570.5	0
1571.5	0
1572.5	0
1573.5	0
1574.5	0
1575.5	0
1576.5	0
1577.5	0
1578.5	0
1579.5	0
1580.5	0
1581.5	0
1582.5	0
1583.5	0
1584.5	0
1585.5	0
1586.5	0
1587.5	0
1588.5	0
1589.5	0
1590.5	0
1591.5	0
1592.5	0
1593.5	0
1594.5	0
1595.5	0
1596.5	0
1597.5	0
1598.5	0
1599.5	0
1600.5	0
1601.5	0
1602.5	0
1603.5	0
1604.5	0
1605.5	0
1606.5	0
1607.5	0
1608.5	0
1609.5	0
1610.5	0
1611.5	0
1612.5	0
1613.5	0
1614.5	0
1615.5	0
1616.5	0
1617.5	0
1618.5	0
1619.5	0
1620.5	0
1621.5	0
1622.5	0
1623.5	0
1624.5	0
1625.5	0
1626.5	0
1627.5	0
1628.5	0
1629.5	0
1630.5	0
1631.5	0
1632.5	0
1633.5	0
1634.5	0
1635.5	0
1636.5	0
1637.5	0
1638.5	0
1639.5	0
1640.5	0
1641.5	0
1642.5	0
1643.5	0
1644.5	0
1645.5	0
1646.5	0
1647.5	0
1648.5	0
1649.5	0
1650.5	0
1651.5	0
1652.5	0
1653.5	0
1654.5	0
1655.5	0
1656.5	0
1657.5	0
1658.5	0
1659.5	0
1660.5	0
1661.5	0
1662.5	0
1663.5	0
1664.5	0
1665.5	0
1666.5	0
1667.5	0
1668.5	0
1669.5	0
1670.5	0
1671.5	0
1672.5	0
1673.5	0
1674.5	0
1675.5	0
1676.5	0
1677.5	0
1678.5	0
1679.5	0
1680.5	0
1681.5	0
1682.5	0
1683.5	0
1684.5	0
1685.5	0
1686.5	0
1687.5	0
1688.5	0
1689.5	0
1690.5	0
1691.5	0
1692.5	0
1693.5	0
1694.5	0
1695.5	0
1696.5	0
1697.5	0
1698.5	0
1699.5	0
1700.5	0
1701.5	0
1702.5	0
1703.5	0
1704.5	0
1705.5	0
1706.5	0
1707.5	0
1708.5	0
1709.5	0
1710.5	0
1711.5	0
1712.5	0
1713.5	0
1714.5	0
1715.5	0
1716.5	0
1717.5	0
1718.5	0
1719.5	0
1720.5	0
1721.5	0
1722.5	0
1723.5	0
1724.5	0
1725.5	0
1726.5	0
1727.5	0
1728.5	0
1729.5	0
1730.5	0
1731.5	0
1732.5	0
1733.5	0
1734.5	0
1735.5	0
1736.5	0
1737.5	0
1738.5	0
1739.5	0
1740.5	0
1741.5	0
1742.5	0
1743.5	0
1744.5	0
1745.5	0
1746.5	0
1747.5	0
1748.5	0
1749.5	0
1750.5	0
1751.5	0
1752.5	0
1753.5	0
1754.5	0
1755.5	0
1756.5	0
1757.5	0
1758.5	0
1759.5	0
1760.5	0
1761.5	0
1762.5	0
1763.5	0
1764.5	0
1765.5	0
1766.5	0
1767.5	0
1768.5	0
1769.5	0
1770.5	0
1771.5	0
1772.5	0
1773.5	0
1774.5	0
1775.5	0
1776.5	0
1777.5	0
1778.5	0
1779.5	0
1780.5	0
1781.5	0
1782.5	0
1783.5	0
1784.5	0
1785.5	0
1786.5	0
1787.5	0
1788.5	0
1789.5	0
1790.5	0
1791.5	0
1792.5	0
1793.5	0
1794.5	0
1795.5	0
1796.5	0
1797.5	0
1798.5	0
1799.5	0
1800.5	0
1801.5	0
1802.5	0
1803.5	0
1804.5	0
1805.5	0
1806.5	0
1807.5	0
1808.5	0
1809.5	0
1810.5	0
1811.5	0
1812.5	0
1813.5	0
1814.5	0
1815.5	0
1816.5	0
1817.5	0
1818.5	0
1819.5	0
1820.5	0
1821.5	0
1822.5	0
1823.5	0
1824.5	0
1825.5	0
1826.5	0
1827.5	0
1828.5	0
1829.5	0
1830.5	0
1831.5	0
1832.5	0
1833.5	0
1834.5	0
1835.5	0
1836.5	0
1837.5	0
1838.5	0
1839.5	0
1840.5	0
1841.5	0
1842.5	0
1843.5	0
1844.5	0
1845.5	0
1846.5	0
1847.5	0
1848.5	0
1849.5	0
1850.5	0
1851.5	0
1852.5	0
1853.5	0
1854.5	0
1855.5	0
1856.5	0
1857.5	0
1858.5	0
1859.5	0
1860.5	0
1861.5	0
1862.5	0
1863.5	0
1864.5	0
1865.5	0
1866.5	0
1867.5	0
1868.5	0
1869.5	0
1870.5	0
1871.5	0
1872.5	0
1873.5	0
1874.5	0
1875.5	0
1876.5	0
1877.5	0
1878.5	0
1879.5	0
1880.5	0
1881.5	0
1882.5	0
1883.5	0
1884.5	0
1885.5	0
1886.5	0
1887.5	0
1888.5	0
1889.5	0
1890.5	0
1891.5	0
1892.5	0
1893.5	0
1894.5	0
1895.5	0
1896.5	0
1897.5	0
1898.5	0
1899.5	0
1900.5	0
1901.5	0
1902.5	0
1903.5	0
1904.5	0
1905.5	0
1906.5	0
1907.5	0
1908.5	0
1909.5	0
1910.5	0
1911.5	0
1912.5	0
1913.5	0
1914.5	0
1915.5	0
1916.5	0
1917.5	0
1918.5	0
1919.5	0
1920.5	0
1921.5	0
1922.5	0
1923.5	0
1924.5	0
1925.5	0
[truncated: 7,743 more rows]

## Sheet: Copy of MCPs TMDS004 1 to 500 3
NTA Experiment Summary File
Created with NTA 3.4 Build 3.4.003
[Experiment Details]
Software Version	NTA 3.4 Build 3.4.003
Experiment Name	mcps TMDS004 1 to 500 mcp buffer-210s 2019-07-17 17-37-58 2019-07-17 17-56-56.nano
Operator Name	jmh
Time Captured	17:56:56 17/07/2019
Sample Description	tmds004
Pre-treatment
Diluent
Remarks	1 to 500-longer exposure
Filename:	mcps TMDS004 1 to 500 mcp buffer-210s 2019-07-17 17-37-58 2019-07-17 17-57-37
Processed	Yes
[Conditions]
Temperature/C	22.319
Viscosity/cP	0.945762
Camera Type	sCMOS
Laser Type	Blue488
Camera Level	13
Slider Shutter	1232
Slider Gain	219
Shutter/ms	30.8
Camera Histogram Upper Limit	8235
Camera Histogram Lower Limit	0
Frame rate/fps	24.9825
Syringe Pump Speed/AU	30
[Settings]
Detection Threshold	7
Max Jump Mode	Auto
Max Jump Distance	12.5471
Blur	Auto
Min Track Length	Auto
First frame	0
Total frames analysed	5246
[Exclusion Regions]
No Exclusion Regions Used
[Results]
Dilution factor (concentrations adjusted for this factor)	Not recorded
Concentration (Particles / ml)	2890000000
Particles per frame	157.7
Centres per frame	138.7
Completed tracks	69105
X-Drift (pix/frame)	-4.4
Y-Drift (pix/frame)	0
[Information]
Completed Tracks	OK
Concentration	OK
Video length	OK
Noise level	No
Vibration detected	No
Vibration correction applied	No
Settings changed?	No
Errors (1)
Errors (2)
[Data Included]
Size distribution - Number weighting - With Percentiles
Size distribution - Surface area weighting - With Percentiles
Size distribution - Volume weighting - With Percentiles
Diffusion distribution - Number weighting - With Percentiles
Diffusion distribution - Surface area weighting - With Percentiles
Diffusion distribution - Volume weighting - With Percentiles
[Size Data]
Analysis Method	FTLA
Weighting	Number
Filename	mcps TMDS004 1 to 500 mcp buffer-210s 2019-07-17 17-37-58 2019-07-17 17-57-37
Mean	147.2
Mode	133.2
SD	33.3
D10	122.5
D50	137.2
D90	190
Valid Tracks	23832
Graph Data
Bin centre (nm)	Concentration (particles / ml)
0.5	0
1.5	0
2.5	0
3.5	0
4.5	0
5.5	0
6.5	0
7.5	0
8.5	0
9.5	0
10.5	0
11.5	0
12.5	0
13.5	0
14.5	0
15.5	0
16.5	0
17.5	0
18.5	0
19.5	0
20.5	0
21.5	0
22.5	0
23.5	0
24.5	0
25.5	0
26.5	0
27.5	0
28.5	0
29.5	0
30.5	0
31.5	0
32.5	0
33.5	0
34.5	0
35.5	0
36.5	0
37.5	0
38.5	0
39.5	0
40.5	0
41.5	0
42.5	0
43.5	0
44.5	0
45.5	0
46.5	0
47.5	0
48.5	0
49.5	0
50.5	0
51.5	0
52.5	0
53.5	0
54.5	0
55.5	0
56.5	0
57.5	0
58.5	0
59.5	0
60.5	0
61.5	0
62.5	0
63.5	0
64.5	0
65.5	0
66.5	0
67.5	0
68.5	0
69.5	0
70.5	0
71.5	0
72.5	0
73.5	0
74.5	0
75.5	0
76.5	2
77.5	4
78.5	8
79.5	16
80.5	32
81.5	62
82.5	117
83.5	215
84.5	385
85.5	672
86.5	1149
87.5	1920
88.5	3144
89.5	5048
90.5	7962
91.5	12349
92.5	18855
93.5	28374
94.5	42125
95.5	61761
96.5	89489
97.5	128241
98.5	181854
99.5	255304
100.5	354964
101.5	488885
102.5	667103
103.5	901950
104.5	1208340
105.5	1604024
106.5	2109773
107.5	2749462
108.5	3550021
109.5	4541225
110.5	5755281
111.5	7226201
112.5	8988903
113.5	11078037
114.5	13526491
115.5	16363567
116.5	19612813
117.5	23289542
118.5	27398078
119.5	31928852
120.5	36855517
121.5	42132336
122.5	47692159
123.5	53445359
124.5	59280121
125.5	65064424
126.5	70649960
127.5	75878047
128.5	80587366
129.5	84623057
130.5	87846479
131.5	90144691
132.5	91438680
133.5	91689358
134.5	90900595
135.5	89118883
136.5	86429642
137.5	82950598
138.5	78823003
139.5	74201711
140.5	69245168
141.5	64106272
142.5	58924846
143.5	53822189
144.5	48897826
145.5	44228353
146.5	39868038
147.5	35850764
148.5	32192821
149.5	28896131
150.5	25951547
151.5	23341936
152.5	21044912
153.5	19035095
154.5	17285905
155.5	15770897
156.5	14464701
157.5	13343630
158.5	12386031
159.5	11572425
160.5	10885518
161.5	10310112
162.5	9832944
163.5	9442507
164.5	9128840
165.5	8883324
166.5	8698482
167.5	8567785
168.5	8485479
169.5	8446423
170.5	8445943
171.5	8479705
172.5	8543607
173.5	8633682
174.5	8746028
175.5	8876749
176.5	9021919
177.5	9177565
178.5	9339670
179.5	9504187
180.5	9667078
181.5	9824354
182.5	9972143
183.5	10106744
184.5	10224696
185.5	10322845
186.5	10398400
187.5	10448982
188.5	10472664
189.5	10467996
190.5	10434016
191.5	10370246
192.5	10276677
193.5	10153742
194.5	10002281
195.5	9823493
196.5	9618896
197.5	9390269
198.5	9139610
199.5	8869084
200.5	8580977
201.5	8277658
202.5	7961542
203.5	7635051
204.5	7300595
205.5	6960536
206.5	6617175
207.5	6272726
208.5	5929302
209.5	5588898
210.5	5253378
211.5	4924461
212.5	4603710
213.5	4292523
214.5	3992125
215.5	3703563
216.5	3427702
217.5	3165224
218.5	2916632
219.5	2682254
220.5	2462249
221.5	2256623
222.5	2065236
223.5	1887821
224.5	1723996
225.5	1573285
226.5	1435136
227.5	1308932
228.5	1194015
229.5	1089699
230.5	995281
231.5	910059
232.5	833341
233.5	764452
234.5	702744
235.5	647603
236.5	598448
237.5	554740
238.5	515978
239.5	481705
240.5	451503
241.5	424997
242.5	401846
243.5	381751
244.5	364446
245.5	349697
246.5	337302
247.5	327088
248.5	318909
249.5	312643
250.5	308192
251.5	305478
252.5	304444
253.5	305051
254.5	307278
255.5	311119
256.5	316582
257.5	323688
258.5	332470
259.5	342972
260.5	355243
261.5	369340
262.5	385323
263.5	403253
264.5	423185
265.5	445171
266.5	469247
267.5	495437
268.5	523738
269.5	554122
270.5	586525
271.5	620844
272.5	656927
273.5	694573
274.5	733521
275.5	773452
276.5	813986
277.5	854682
278.5	895042
279.5	934515
280.5	972512
281.5	1008411
282.5	1041575
283.5	1071374
284.5	1097194
285.5	1118466
286.5	1134684
287.5	1145421
288.5	1150349
289.5	1149255
290.5	1142044
291.5	1128753
292.5	1109546
293.5	1084708
294.5	1054642
295.5	1019847
296.5	980905
297.5	938460
298.5	893195
299.5	845812
300.5	797009
301.5	747459
302.5	697797
303.5	648604
304.5	600396
305.5	553616
306.5	508635
307.5	465746
308.5	425169
309.5	387056
310.5	351495
311.5	318520
312.5	288115
313.5	260225
314.5	234765
315.5	211624
316.5	190672
317.5	171771
318.5	154773
319.5	139530
320.5	125896
321.5	113727
322.5	102886
323.5	93245
324.5	84683
325.5	77089
326.5	70360
327.5	64403
328.5	59135
329.5	54479
330.5	50368
331.5	46742
332.5	43546
333.5	40734
334.5	38263
335.5	36098
336.5	34205
337.5	32557
338.5	31129
339.5	29900
340.5	28851
341.5	27967
342.5	27234
343.5	26641
344.5	26176
345.5	25833
346.5	25604
347.5	25483
348.5	25466
349.5	25548
350.5	25727
351.5	26001
352.5	26367
353.5	26825
354.5	27373
355.5	28012
356.5	28739
357.5	29556
358.5	30461
359.5	31454
360.5	32534
361.5	33699
362.5	34947
363.5	36277
364.5	37684
365.5	39164
366.5	40713
367.5	42323
368.5	43987
369.5	45697
370.5	47443
371.5	49213
372.5	50995
373.5	52775
374.5	54540
375.5	56274
376.5	57961
377.5	59584
378.5	61126
379.5	62573
380.5	63907
381.5	65113
382.5	66177
383.5	67086
384.5	67829
385.5	68397
386.5	68782
387.5	68981
388.5	68989
389.5	68808
390.5	68440
391.5	67890
392.5	67164
393.5	66272
394.5	65225
395.5	64035
396.5	62716
397.5	61283
398.5	59751
399.5	58137
400.5	56456
401.5	54723
402.5	52955
403.5	51165
404.5	49367
405.5	47575
406.5	45800
407.5	44052
408.5	42341
409.5	40675
410.5	39061
411.5	37505
412.5	36012
413.5	34585
414.5	33228
415.5	31942
416.5	30728
417.5	29589
418.5	28522
419.5	27529
420.5	26609
421.5	25760
422.5	24982
423.5	24274
424.5	23633
425.5	23059
426.5	22550
427.5	22106
428.5	21724
429.5	21405
430.5	21146
431.5	20948
432.5	20811
433.5	20733
434.5	20716
435.5	20759
436.5	20864
437.5	21030
438.5	21261
439.5	21556
440.5	21918
441.5	22350
442.5	22853
443.5	23431
444.5	24085
445.5	24821
446.5	25641
447.5	26548
448.5	27547
449.5	28642
450.5	29836
451.5	31132
452.5	32536
453.5	34049
454.5	35674
455.5	37413
456.5	39268
457.5	41238
458.5	43322
459.5	45516
460.5	47817
461.5	50217
462.5	52707
463.5	55274
464.5	57905
465.5	60580
466.5	63279
467.5	65977
468.5	68647
469.5	71258
470.5	73776
471.5	76164
472.5	78384
473.5	80397
474.5	82163
475.5	83641
476.5	84795
477.5	85588
478.5	85989
479.5	85972
480.5	85516
481.5	84609
482.5	83245
483.5	81429
484.5	79175
485.5	76504
486.5	73447
487.5	70045
488.5	66345
489.5	62399
490.5	58265
491.5	54003
492.5	49676
493.5	45343
494.5	41062
495.5	36887
496.5	32866
497.5	29041
498.5	25445
499.5	22104
500.5	19036
501.5	16250
502.5	13749
503.5	11529
504.5	9580
505.5	7889
506.5	6436
507.5	5203
508.5	4167
509.5	3306
510.5	2599
511.5	2024
512.5	1561
513.5	1193
514.5	903
515.5	677
516.5	503
517.5	370
518.5	270
519.5	195
520.5	139
521.5	99
522.5	69
523.5	48
524.5	33
525.5	23
526.5	15
527.5	10
528.5	7
529.5	5
530.5	3
531.5	2
532.5	1
533.5	0
534.5	0
535.5	0
536.5	0
537.5	0
538.5	0
539.5	0
540.5	0
541.5	0
542.5	0
543.5	0
544.5	0
545.5	0
546.5	0
547.5	0
548.5	0
549.5	0
550.5	0
551.5	0
552.5	0
553.5	0
554.5	0
555.5	0
556.5	0
557.5	0
558.5	0
559.5	0
560.5	0
561.5	0
562.5	0
563.5	0
564.5	0
565.5	0
566.5	0
567.5	0
568.5	0
569.5	0
570.5	0
571.5	0
572.5	0
573.5	0
574.5	0
575.5	0
576.5	0
577.5	0
578.5	0
579.5	0
580.5	0
581.5	0
582.5	0
583.5	0
584.5	0
585.5	0
586.5	0
587.5	0
588.5	0
589.5	0
590.5	0
591.5	0
592.5	0
593.5	0
594.5	0
595.5	0
596.5	0
597.5	0
598.5	0
599.5	0
600.5	0
601.5	0
602.5	0
603.5	0
604.5	0
605.5	0
606.5	0
607.5	0
608.5	0
609.5	0
610.5	0
611.5	0
612.5	0
613.5	0
614.5	0
615.5	0
616.5	0
617.5	0
618.5	0
619.5	0
620.5	0
621.5	0
622.5	0
623.5	0
624.5	0
625.5	0
626.5	0
627.5	0
628.5	0
629.5	0
630.5	0
631.5	0
632.5	0
633.5	0
634.5	0
635.5	0
636.5	0
637.5	0
638.5	0
639.5	0
640.5	0
641.5	0
642.5	0
643.5	0
644.5	0
645.5	0
646.5	0
647.5	0
648.5	0
649.5	0
650.5	0
651.5	0
652.5	0
653.5	0
654.5	0
655.5	0
656.5	0
657.5	0
658.5	0
659.5	0
660.5	0
661.5	0
662.5	0
663.5	0
664.5	0
665.5	0
666.5	0
667.5	0
668.5	0
669.5	0
670.5	0
671.5	0
672.5	0
673.5	0
674.5	0
675.5	0
676.5	0
677.5	0
678.5	0
679.5	0
680.5	0
681.5	0
682.5	0
683.5	0
684.5	0
685.5	0
686.5	0
687.5	0
688.5	0
689.5	0
690.5	0
691.5	0
692.5	0
693.5	0
694.5	0
695.5	0
696.5	0
697.5	0
698.5	0
699.5	0
700.5	0
701.5	0
702.5	0
703.5	0
704.5	0
705.5	0
706.5	0
707.5	0
708.5	0
709.5	0
710.5	0
711.5	0
712.5	0
713.5	0
714.5	0
715.5	0
716.5	0
717.5	0
718.5	0
719.5	0
720.5	0
721.5	0
722.5	0
723.5	0
724.5	0
725.5	0
726.5	0
727.5	0
728.5	0
729.5	0
730.5	0
731.5	0
732.5	0
733.5	0
734.5	0
735.5	0
736.5	0
737.5	0
738.5	0
739.5	0
740.5	0
741.5	0
742.5	0
743.5	0
744.5	0
745.5	0
746.5	0
747.5	0
748.5	0
749.5	0
750.5	0
751.5	0
752.5	0
753.5	0
754.5	0
755.5	0
756.5	0
757.5	0
758.5	0
759.5	0
760.5	0
761.5	0
762.5	0
763.5	0
764.5	0
765.5	0
766.5	0
767.5	0
768.5	0
769.5	0
770.5	0
771.5	0
772.5	0
773.5	0
774.5	0
775.5	0
776.5	0
777.5	0
778.5	0
779.5	0
780.5	0
781.5	0
782.5	0
783.5	0
784.5	0
785.5	0
786.5	0
787.5	0
788.5	0
789.5	0
790.5	0
791.5	0
792.5	0
793.5	0
794.5	0
795.5	0
796.5	0
797.5	0
798.5	0
799.5	0
800.5	0
801.5	0
802.5	0
803.5	0
804.5	0
805.5	0
806.5	0
807.5	0
808.5	0
809.5	0
810.5	0
811.5	0
812.5	0
813.5	0
814.5	0
815.5	0
816.5	0
817.5	0
818.5	0
819.5	0
820.5	0
821.5	0
822.5	0
823.5	0
824.5	0
825.5	0
826.5	0
827.5	0
828.5	0
829.5	0
830.5	0
831.5	0
832.5	0
833.5	0
834.5	0
835.5	0
836.5	0
837.5	0
838.5	0
839.5	0
840.5	0
841.5	0
842.5	0
843.5	0
844.5	0
845.5	0
846.5	0
847.5	0
848.5	0
849.5	0
850.5	0
851.5	0
852.5	0
853.5	0
854.5	0
855.5	0
856.5	0
857.5	0
858.5	0
859.5	0
860.5	0
861.5	0
862.5	0
863.5	0
864.5	0
865.5	0
866.5	0
867.5	0
868.5	0
869.5	0
870.5	0
871.5	0
872.5	0
873.5	0
874.5	0
875.5	0
876.5	0
877.5	0
878.5	0
879.5	0
880.5	0
881.5	0
882.5	0
883.5	0
884.5	0
885.5	0
886.5	0
887.5	0
888.5	0
889.5	0
890.5	0
891.5	0
892.5	0
893.5	0
894.5	0
895.5	0
896.5	0
897.5	0
898.5	0
899.5	0
900.5	0
901.5	0
902.5	0
903.5	0
904.5	0
905.5	0
906.5	0
907.5	0
908.5	0
909.5	0
910.5	0
911.5	0
912.5	0
913.5	0
914.5	0
915.5	0
916.5	0
917.5	0
918.5	0
919.5	0
920.5	0
921.5	0
922.5	0
923.5	0
924.5	0
925.5	0
926.5	0
927.5	0
928.5	0
929.5	0
930.5	0
931.5	0
932.5	0
933.5	0
934.5	0
935.5	0
936.5	0
937.5	0
938.5	0
939.5	0
940.5	0
941.5	0
942.5	0
943.5	0
944.5	0
945.5	0
946.5	0
947.5	0
948.5	0
949.5	0
950.5	0
951.5	0
952.5	0
953.5	0
954.5	0
955.5	0
956.5	0
957.5	0
958.5	0
959.5	0
960.5	0
961.5	0
962.5	0
963.5	0
964.5	0
965.5	0
966.5	0
967.5	0
968.5	0
969.5	0
970.5	0
971.5	0
972.5	0
973.5	0
974.5	0
975.5	0
976.5	0
977.5	0
978.5	0
979.5	0
980.5	0
981.5	0
982.5	0
983.5	0
984.5	0
985.5	0
986.5	0
987.5	0
988.5	0
989.5	0
990.5	0
991.5	0
992.5	0
993.5	0
994.5	0
995.5	0
996.5	0
997.5	0
998.5	0
999.5	0
1000.5	0
1001.5	0
1002.5	0
1003.5	0
1004.5	0
1005.5	0
1006.5	0
1007.5	0
1008.5	0
1009.5	0
1010.5	0
1011.5	0
1012.5	0
1013.5	0
1014.5	0
1015.5	0
1016.5	0
1017.5	0
1018.5	0
1019.5	0
1020.5	0
1021.5	0
1022.5	0
1023.5	0
1024.5	0
1025.5	0
1026.5	0
1027.5	0
1028.5	0
1029.5	0
1030.5	0
1031.5	0
1032.5	0
1033.5	0
1034.5	0
1035.5	0
1036.5	0
1037.5	0
1038.5	0
1039.5	0
1040.5	0
1041.5	0
1042.5	0
1043.5	0
1044.5	0
1045.5	0
1046.5	0
1047.5	0
1048.5	0
1049.5	0
1050.5	0
1051.5	0
1052.5	0
1053.5	0
1054.5	0
1055.5	0
1056.5	0
1057.5	0
1058.5	0
1059.5	0
1060.5	0
1061.5	0
1062.5	0
1063.5	0
1064.5	0
1065.5	0
1066.5	0
1067.5	0
1068.5	0
1069.5	0
1070.5	0
1071.5	0
1072.5	0
1073.5	0
1074.5	0
1075.5	0
1076.5	0
1077.5	0
1078.5	0
1079.5	0
1080.5	0
1081.5	0
1082.5	0
1083.5	0
1084.5	0
1085.5	0
1086.5	0
1087.5	0
1088.5	0
1089.5	0
1090.5	0
1091.5	0
1092.5	0
1093.5	0
1094.5	0
1095.5	0
1096.5	0
1097.5	0
1098.5	0
1099.5	0
1100.5	0
1101.5	0
1102.5	0
1103.5	0
1104.5	0
1105.5	0
1106.5	0
1107.5	0
1108.5	0
1109.5	0
1110.5	0
1111.5	0
1112.5	0
1113.5	0
1114.5	0
1115.5	0
1116.5	0
1117.5	0
1118.5	0
1119.5	0
1120.5	0
1121.5	0
1122.5	0
1123.5	0
1124.5	0
1125.5	0
1126.5	0
1127.5	0
1128.5	0
1129.5	0
1130.5	0
1131.5	0
1132.5	0
1133.5	0
1134.5	0
1135.5	0
1136.5	0
1137.5	0
1138.5	0
1139.5	0
1140.5	0
1141.5	0
1142.5	0
1143.5	0
1144.5	0
1145.5	0
1146.5	0
1147.5	0
1148.5	0
1149.5	0
1150.5	0
1151.5	0
1152.5	0
1153.5	0
1154.5	0
1155.5	0
1156.5	0
1157.5	0
1158.5	0
1159.5	0
1160.5	0
1161.5	0
1162.5	0
1163.5	0
1164.5	0
1165.5	0
1166.5	0
1167.5	0
1168.5	0
1169.5	0
1170.5	0
1171.5	0
1172.5	0
1173.5	0
1174.5	0
1175.5	0
1176.5	0
1177.5	0
1178.5	0
1179.5	0
1180.5	0
1181.5	0
1182.5	0
1183.5	0
1184.5	0
1185.5	0
1186.5	0
1187.5	0
1188.5	0
1189.5	0
1190.5	0
1191.5	0
1192.5	0
1193.5	0
1194.5	0
1195.5	0
1196.5	0
1197.5	0
1198.5	0
1199.5	0
1200.5	0
1201.5	0
1202.5	0
1203.5	0
1204.5	0
1205.5	0
1206.5	0
1207.5	0
1208.5	0
1209.5	0
1210.5	0
1211.5	0
1212.5	0
1213.5	0
1214.5	0
1215.5	0
1216.5	0
1217.5	0
1218.5	0
1219.5	0
1220.5	0
1221.5	0
1222.5	0
1223.5	0
1224.5	0
1225.5	0
1226.5	0
1227.5	0
1228.5	0
1229.5	0
1230.5	0
1231.5	0
1232.5	0
1233.5	0
1234.5	0
1235.5	0
1236.5	0
1237.5	0
1238.5	0
1239.5	0
1240.5	0
1241.5	0
1242.5	0
1243.5	0
1244.5	0
1245.5	0
1246.5	0
1247.5	0
1248.5	0
1249.5	0
1250.5	0
1251.5	0
1252.5	0
1253.5	0
1254.5	0
1255.5	0
1256.5	0
1257.5	0
1258.5	0
1259.5	0
1260.5	0
1261.5	0
1262.5	0
1263.5	0
1264.5	0
1265.5	0
1266.5	0
1267.5	0
1268.5	0
1269.5	0
1270.5	0
1271.5	0
1272.5	0
1273.5	0
1274.5	0
1275.5	0
1276.5	0
1277.5	0
1278.5	0
1279.5	0
1280.5	0
1281.5	0
1282.5	0
1283.5	0
1284.5	0
1285.5	0
1286.5	0
1287.5	0
1288.5	0
1289.5	0
1290.5	0
1291.5	0
1292.5	0
1293.5	0
1294.5	0
1295.5	0
1296.5	0
1297.5	0
1298.5	0
1299.5	0
1300.5	0
1301.5	0
1302.5	0
1303.5	0
1304.5	0
1305.5	0
1306.5	0
1307.5	0
1308.5	0
1309.5	0
1310.5	0
1311.5	0
1312.5	0
1313.5	0
1314.5	0
1315.5	0
1316.5	0
1317.5	0
1318.5	0
1319.5	0
1320.5	0
1321.5	0
1322.5	0
1323.5	0
1324.5	0
1325.5	0
1326.5	0
1327.5	0
1328.5	0
1329.5	0
1330.5	0
1331.5	0
1332.5	0
1333.5	0
1334.5	0
1335.5	0
1336.5	0
1337.5	0
1338.5	0
1339.5	0
1340.5	0
1341.5	0
1342.5	0
1343.5	0
1344.5	0
1345.5	0
1346.5	0
1347.5	0
1348.5	0
1349.5	0
1350.5	0
1351.5	0
1352.5	0
1353.5	0
1354.5	0
1355.5	0
1356.5	0
1357.5	0
1358.5	0
1359.5	0
1360.5	0
1361.5	0
1362.5	0
1363.5	0
1364.5	0
1365.5	0
1366.5	0
1367.5	0
1368.5	0
1369.5	0
1370.5	0
1371.5	0
1372.5	0
1373.5	0
1374.5	0
1375.5	0
1376.5	0
1377.5	0
1378.5	0
1379.5	0
1380.5	0
1381.5	0
1382.5	0
1383.5	0
1384.5	0
1385.5	0
1386.5	0
1387.5	0
1388.5	0
1389.5	0
1390.5	0
1391.5	0
1392.5	0
1393.5	0
1394.5	0
1395.5	0
1396.5	0
1397.5	0
1398.5	0
1399.5	0
1400.5	0
1401.5	0
1402.5	0
1403.5	0
1404.5	0
1405.5	0
1406.5	0
1407.5	0
1408.5	0
1409.5	0
1410.5	0
1411.5	0
1412.5	0
1413.5	0
1414.5	0
1415.5	0
1416.5	0
1417.5	0
1418.5	0
1419.5	0
1420.5	0
1421.5	0
1422.5	0
1423.5	0
1424.5	0
1425.5	0
1426.5	0
1427.5	0
1428.5	0
1429.5	0
1430.5	0
1431.5	0
1432.5	0
1433.5	0
1434.5	0
1435.5	0
1436.5	0
1437.5	0
1438.5	0
1439.5	0
1440.5	0
1441.5	0
1442.5	0
1443.5	0
1444.5	0
1445.5	0
1446.5	0
1447.5	0
1448.5	0
1449.5	0
1450.5	0
1451.5	0
1452.5	0
1453.5	0
1454.5	0
1455.5	0
1456.5	0
1457.5	0
1458.5	0
1459.5	0
1460.5	0
1461.5	0
1462.5	0
1463.5	0
1464.5	0
1465.5	0
1466.5	0
1467.5	0
1468.5	0
1469.5	0
1470.5	0
1471.5	0
1472.5	0
1473.5	0
1474.5	0
1475.5	0
1476.5	0
1477.5	0
1478.5	0
1479.5	0
1480.5	0
1481.5	0
1482.5	0
1483.5	0
1484.5	0
1485.5	0
1486.5	0
1487.5	0
1488.5	0
1489.5	0
1490.5	0
1491.5	0
1492.5	0
1493.5	0
1494.5	0
1495.5	0
1496.5	0
1497.5	0
1498.5	0
1499.5	0
1500.5	0
1501.5	0
1502.5	0
1503.5	0
1504.5	0
1505.5	0
1506.5	0
1507.5	0
1508.5	0
1509.5	0
1510.5	0
1511.5	0
1512.5	0
1513.5	0
1514.5	0
1515.5	0
1516.5	0
1517.5	0
1518.5	0
1519.5	0
1520.5	0
1521.5	0
1522.5	0
1523.5	0
1524.5	0
1525.5	0
1526.5	0
1527.5	0
1528.5	0
1529.5	0
1530.5	0
1531.5	0
1532.5	0
1533.5	0
1534.5	0
1535.5	0
1536.5	0
1537.5	0
1538.5	0
1539.5	0
1540.5	0
1541.5	0
1542.5	0
1543.5	0
1544.5	0
1545.5	0
1546.5	0
1547.5	0
1548.5	0
1549.5	0
1550.5	0
1551.5	0
1552.5	0
1553.5	0
1554.5	0
1555.5	0
1556.5	0
1557.5	0
1558.5	0
1559.5	0
1560.5	0
1561.5	0
1562.5	0
1563.5	0
1564.5	0
1565.5	0
1566.5	0
1567.5	0
1568.5	0
1569.5	0
1570.5	0
1571.5	0
1572.5	0
1573.5	0
1574.5	0
1575.5	0
1576.5	0
1577.5	0
1578.5	0
1579.5	0
1580.5	0
1581.5	0
1582.5	0
1583.5	0
1584.5	0
1585.5	0
1586.5	0
1587.5	0
1588.5	0
1589.5	0
1590.5	0
1591.5	0
1592.5	0
1593.5	0
1594.5	0
1595.5	0
1596.5	0
1597.5	0
1598.5	0
1599.5	0
1600.5	0
1601.5	0
1602.5	0
1603.5	0
1604.5	0
1605.5	0
1606.5	0
1607.5	0
1608.5	0
1609.5	0
1610.5	0
1611.5	0
1612.5	0
1613.5	0
1614.5	0
1615.5	0
1616.5	0
1617.5	0
1618.5	0
1619.5	0
1620.5	0
1621.5	0
1622.5	0
1623.5	0
1624.5	0
1625.5	0
1626.5	0
1627.5	0
1628.5	0
1629.5	0
1630.5	0
1631.5	0
1632.5	0
1633.5	0
1634.5	0
1635.5	0
1636.5	0
1637.5	0
1638.5	0
1639.5	0
1640.5	0
1641.5	0
1642.5	0
1643.5	0
1644.5	0
1645.5	0
1646.5	0
1647.5	0
1648.5	0
1649.5	0
1650.5	0
1651.5	0
1652.5	0
1653.5	0
1654.5	0
1655.5	0
1656.5	0
1657.5	0
1658.5	0
1659.5	0
1660.5	0
1661.5	0
1662.5	0
1663.5	0
1664.5	0
1665.5	0
1666.5	0
1667.5	0
1668.5	0
1669.5	0
1670.5	0
1671.5	0
1672.5	0
1673.5	0
1674.5	0
1675.5	0
1676.5	0
1677.5	0
1678.5	0
1679.5	0
1680.5	0
1681.5	0
1682.5	0
1683.5	0
1684.5	0
1685.5	0
1686.5	0
1687.5	0
1688.5	0
1689.5	0
1690.5	0
1691.5	0
1692.5	0
1693.5	0
1694.5	0
1695.5	0
1696.5	0
1697.5	0
1698.5	0
1699.5	0
1700.5	0
1701.5	0
1702.5	0
1703.5	0
1704.5	0
1705.5	0
1706.5	0
1707.5	0
1708.5	0
1709.5	0
1710.5	0
1711.5	0
1712.5	0
1713.5	0
1714.5	0
1715.5	0
1716.5	0
1717.5	0
1718.5	0
1719.5	0
1720.5	0
1721.5	0
1722.5	0
1723.5	0
1724.5	0
1725.5	0
1726.5	0
1727.5	0
1728.5	0
1729.5	0
1730.5	0
1731.5	0
1732.5	0
1733.5	0
1734.5	0
1735.5	0
1736.5	0
1737.5	0
1738.5	0
1739.5	0
1740.5	0
1741.5	0
1742.5	0
1743.5	0
1744.5	0
1745.5	0
1746.5	0
1747.5	0
1748.5	0
1749.5	0
1750.5	0
1751.5	0
1752.5	0
1753.5	0
1754.5	0
1755.5	0
1756.5	0
1757.5	0
1758.5	0
1759.5	0
1760.5	0
1761.5	0
1762.5	0
1763.5	0
1764.5	0
1765.5	0
1766.5	0
1767.5	0
1768.5	0
1769.5	0
1770.5	0
1771.5	0
1772.5	0
1773.5	0
1774.5	0
1775.5	0
1776.5	0
1777.5	0
1778.5	0
1779.5	0
1780.5	0
1781.5	0
1782.5	0
1783.5	0
1784.5	0
1785.5	0
1786.5	0
1787.5	0
1788.5	0
1789.5	0
1790.5	0
1791.5	0
1792.5	0
1793.5	0
1794.5	0
1795.5	0
1796.5	0
1797.5	0
1798.5	0
1799.5	0
1800.5	0
1801.5	0
1802.5	0
1803.5	0
1804.5	0
1805.5	0
1806.5	0
1807.5	0
1808.5	0
1809.5	0
1810.5	0
1811.5	0
1812.5	0
1813.5	0
1814.5	0
1815.5	0
1816.5	0
1817.5	0
1818.5	0
1819.5	0
1820.5	0
1821.5	0
1822.5	0
1823.5	0
1824.5	0
1825.5	0
1826.5	0
1827.5	0
1828.5	0
1829.5	0
1830.5	0
1831.5	0
1832.5	0
1833.5	0
1834.5	0
1835.5	0
1836.5	0
1837.5	0
1838.5	0
1839.5	0
1840.5	0
1841.5	0
1842.5	0
1843.5	0
1844.5	0
1845.5	0
1846.5	0
1847.5	0
1848.5	0
1849.5	0
1850.5	0
1851.5	0
1852.5	0
1853.5	0
1854.5	0
1855.5	0
1856.5	0
1857.5	0
1858.5	0
1859.5	0
1860.5	0
1861.5	0
1862.5	0
1863.5	0
1864.5	0
1865.5	0
1866.5	0
1867.5	0
1868.5	0
1869.5	0
1870.5	0
1871.5	0
1872.5	0
1873.5	0
1874.5	0
1875.5	0
1876.5	0
1877.5	0
1878.5	0
1879.5	0
1880.5	0
1881.5	0
1882.5	0
1883.5	0
1884.5	0
1885.5	0
1886.5	0
1887.5	0
1888.5	0
1889.5	0
1890.5	0
1891.5	0
1892.5	0
1893.5	0
1894.5	0
1895.5	0
1896.5	0
1897.5	0
1898.5	0
1899.5	0
1900.5	0
1901.5	0
1902.5	0
1903.5	0
1904.5	0
1905.5	0
1906.5	0
1907.5	0
1908.5	0
1909.5	0
1910.5	0
1911.5	0
1912.5	0
1913.5	0
1914.5	0
1915.5	0
1916.5	0
1917.5	0
1918.5	0
1919.5	0
1920.5	0
1921.5	0
1922.5	0
1923.5	0
1924.5	0
1925.5	0
[truncated: 7,743 more rows]

## Sheet: Copy of MCPs TMDS004 1 to 500 6
NTA Experiment Summary File
Created with NTA 3.4 Build 3.4.003
[Experiment Details]
Software Version	NTA 3.4 Build 3.4.003
Experiment Name	mcps TMDS004 1 to 500 mcp buffer 2019-07-17 17-37-58.nano
Operator Name	jmh
Time Captured	17:37:58 17/07/2019
Sample Description	tmds004
Pre-treatment
Diluent
Remarks	1 to 500
Filename:	mcps TMDS004 1 to 500 mcp buffer 2019-07-17 17-38-27	mcps TMDS004 1 to 500 mcp buffer 2019-07-17 17-39-39	mcps TMDS004 1 to 500 mcp buffer 2019-07-17 17-40-46	mcps TMDS004 1 to 500 mcp buffer 2019-07-17 17-41-59	mcps TMDS004 1 to 500 mcp buffer 2019-07-17 17-43-07
Processed	Yes	Yes	Yes	Yes	Yes
[Conditions]
Temperature/C	22.101	22.134	22.161	22.186	22.209
Viscosity/cP	0.950659	0.949915	0.949307	0.948745	0.948228
Camera Type	sCMOS	sCMOS	sCMOS	sCMOS	sCMOS
Laser Type	Blue488	Blue488	Blue488	Blue488	Blue488
Camera Level	13	13	13	13	13
Slider Shutter	1232	1232	1232	1232	1232
Slider Gain	219	219	219	219	219
Shutter/ms	30.8	30.8	30.8	30.8	30.8
Camera Histogram Upper Limit	8235	8235	8235	8235	8235
Camera Histogram Lower Limit	0	0	0	0	0
Frame rate/fps	24.9825	24.9825	24.9825	24.9825	24.9825
Syringe Pump Speed/AU	30	30	30	30	30
[Settings]
Detection Threshold	7	7	7	7	7
Max Jump Mode	Auto	Auto	Auto	Auto	Auto
Max Jump Distance	12.0862	12.2503	12.1482	12.3839	12.5391
Blur	Auto	Auto	Auto	Auto	Auto
Min Track Length	Auto	Auto	Auto	Auto	Auto
First frame	0	0	0	0	0
Total frames analysed	1498	1498	1498	1498	1498
[Exclusion Regions]
No Exclusion Regions Used
[Results]						Average	Standard Error
Dilution factor (concentrations adjusted for this factor)	Not recorded	Not recorded	Not recorded	Not recorded	Not recorded
Concentration (Particles / ml)	3460000000	3390000000	3180000000	2910000000	2820000000	3150000000	127000000
Particles per frame	189.3	185.1	173.9	158.7	154.1	172.2	7
Centres per frame	160.8	157.3	149.8	138.3	134.3	148.1	5.2
Completed tracks	23602	23094	21361	19342	18660
X-Drift (pix/frame)	-4.1	-4.2	-4.3	-4.3	-4.3
Y-Drift (pix/frame)	-0.1	0	0	0	0
[Information]
Completed Tracks	OK	OK	OK	OK	OK
Concentration	OK	OK	OK	OK	OK
Video length	OK	OK	OK	OK	OK
Noise level	No	No	No	No	No
Vibration detected	No	No	Minor vibration	No	No
Vibration correction applied	No	No	Yes	No	No
Settings changed?	No	No	No	No	No
Errors (1)
Errors (2)
[Data Included]
Size distribution - Number weighting - With Percentiles
Size distribution - Surface area weighting - With Percentiles
Size distribution - Volume weighting - With Percentiles
Diffusion distribution - Number weighting - With Percentiles
Diffusion distribution - Surface area weighting - With Percentiles
Diffusion distribution - Volume weighting - With Percentiles
[Size Data]
Analysis Method	FTLA
Weighting	Number
Filename	mcps TMDS004 1 to 500 mcp buffer 2019-07-17 17-38-27	mcps TMDS004 1 to 500 mcp buffer 2019-07-17 17-39-39	mcps TMDS004 1 to 500 mcp buffer 2019-07-17 17-40-46	mcps TMDS004 1 to 500 mcp buffer 2019-07-17 17-41-59	mcps TMDS004 1 to 500 mcp buffer 2019-07-17 17-43-07	Average	Standard Error
Mean	148.5	149.4	151.7	147.9	150.2	149.5	0.7
Mode	131.9	129.1	134	133	133.4	132.3	0.9
SD	34	37.5	35.1	33.3	34.9	35	0.7
D10	121.6	120.8	123.7	123.3	121.7	122.2	0.5
D50	139	136.8	140.7	138	140.9	139.1	0.8
D90	191.5	192	192.9	187.6	185.5	189.9	1.4
Valid Tracks	7946	7852	7434	6797	6547
Graph Data
Bin centre (nm)	Concentration (particles / ml)	Concentration (particles / ml)	Concentration (particles / ml)	Concentration (particles / ml)	Concentration (particles / ml)	Concentration average	Standard Error
0.5	0	0	0	0	0	0	0
1.5	0	0	0	0	0	0	0
2.5	0	0	0	0	0	0	0
3.5	0	0	0	0	0	0	0
4.5	0	0	0	0	0	0	0
5.5	0	0	0	0	0	0	0
6.5	0	0	0	0	0	0	0
7.5	0	0	0	0	0	0	0
8.5	0	0	0	0	0	0	0
9.5	0	0	0	0	0	0	0
10.5	0	0	0	0	0	0	0
11.5	0	0	0	0	0	0	0
12.5	0	0	0	0	0	0	0
13.5	0	0	0	0	0	0	0
14.5	0	0	0	0	0	0	0
15.5	0	0	0	0	0	0	0
16.5	0	0	0	0	0	0	0
17.5	0	0	0	0	0	0	0
18.5	0	0	0	0	0	0	0
19.5	0	0	0	0	0	0	0
20.5	0	0	0	0	0	0	0
21.5	0	0	0	0	0	0	0
22.5	0	0	0	0	0	0	0
23.5	0	0	0	0	0	0	0
24.5	0	0	0	0	0	0	0
25.5	0	0	0	0	0	0	0
26.5	0	0	0	0	0	0	0
27.5	0	0	0	0	0	0	0
28.5	0	0	0	0	0	0	0
29.5	0	0	0	0	0	0	0
30.5	0	0	0	0	0	0	0
31.5	0	0	0	0	0	0	0
32.5	0	0	0	0	0	0	0
33.5	0	0	0	0	0	0	0
34.5	0	0	0	0	0	0	0
35.5	0	0	0	0	0	0	0
36.5	0	0	0	0	0	0	0
37.5	0	0	0	0	0	0	0
38.5	0	0	0	0	0	0	0
39.5	0	0	0	0	0	0	0
40.5	0	10	0	0	0	2	2
41.5	0	133	0	0	0	27	27
42.5	0	1070	0	0	0	214	214
43.5	0	5487	0	0	0	1097	1097
44.5	0	18520	0	0	0	3704	3704
45.5	0	42552	0	0	0	8510	8510
46.5	0	68821	0	0	0	13764	13764
47.5	0	80966	0	0	0	16193	16193
48.5	0	71560	0	0	0	14312	14312
49.5	0	49047	0	0	0	9809	9809
50.5	0	26896	0	0	0	5379	5379
51.5	0	12167	0	0	0	2433	2433
52.5	0	4680	0	0	0	936	936
53.5	0	1576	0	0	0	315	315
54.5	0	478	0	0	0	96	96
55.5	0	134	0	0	0	27	27
56.5	0	36	0	0	0	7	7
57.5	0	9	0	0	0	2	2
58.5	0	2	0	0	0	0	0
59.5	0	0	0	0	0	0	0
60.5	0	0	0	0	0	0	0
61.5	0	0	0	0	0	0	0
62.5	0	0	0	0	0	0	0
63.5	0	0	0	0	0	0	0
64.5	0	0	0	0	0	0	0
65.5	0	0	0	0	0	0	0
66.5	0	0	0	0	0	0	0
67.5	0	0	0	0	0	0	0
68.5	0	0	0	0	0	0	0
69.5	0	0	0	0	0	0	0
70.5	0	0	0	0	0	0	0
71.5	0	0	0	0	0	0	0
72.5	0	0	0	0	0	0	0
73.5	0	0	0	0	0	0	0
74.5	0	0	0	0	0	0	0
75.5	0	0	0	0	0	0	0
76.5	0	0	0	0	1	0	0
77.5	0	0	0	0	3	0	0
78.5	0	0	0	0	8	2	2
79.5	0	0	0	0	18	4	4
80.5	0	0	0	0	39	8	8
81.5	3	0	0	0	84	17	17
82.5	12	0	0	0	174	37	34
83.5	38	0	3	0	350	78	68
84.5	113	0	13	0	681	161	132
85.5	302	0	50	0	1284	327	246
86.5	744	2	179	0	2343	654	444
87.5	1691	4	568	0	4142	1281	779
88.5	3567	11	1618	2	7096	2459	1332
89.5	7026	26	4137	7	11794	4598	2235
90.5	13001	61	9544	22	19039	8333	3711
91.5	22742	142	19988	66	29899	14567	6122
92.5	37845	324	38271	186	45758	24477	9988
93.5	60267	719	67526	488	68376	39475	15932
94.5	92371	1560	110717	1200	99969	61163	24580
95.5	136994	3295	170172	2762	143305	91305	36467
96.5	197572	6772	247344	5977	201833	131900	51983
97.5	278324	13531	342937	12210	279844	185369	71382
98.5	384505	26264	457332	23639	382670	254882	94831
99.5	522728	49503	591198	43554	516921	344781	122463
100.5	701355	90578	746121	76684	690748	461097	154396
101.5	930951	160874	925150	129533	914126	612127	190704
102.5	1224796	277351	1133233	210741	1199127	809050	231385
103.5	1599427	464230	1377580	331440	1560154	1066566	276362
104.5	2075181	754615	1667998	505637	2014090	1403504	325664
105.5	2676683	1191764	2017258	750619	2580314	1843328	379897
106.5	3433200	1829616	2441500	1087378	3280505	2414440	441123
107.5	4378743	2732192	2960680	1541025	4138203	3150169	514080
108.5	5551796	3971554	3599007	2141160	5178052	4088314	607197
109.5	6994517	5624175	4385276	2922093	6424709	5270154	732399
110.5	8751266	7765781	5352991	3922828	7901433	6738860	902956
111.5	10866365	10465011	6540109	5186650	9628409	8537309	1130194
112.5	13381040	13776435	7988245	6760178	11620908	10705361	1420848
113.5	16329638	17733640	9741174	8691731	13887454	13276728	1775946
114.5	19735323	22343134	11842506	11028885	16428162	16275602	2190756
115.5	23605629	27579736	14332497	13815197	19233452	19713302	2655202
116.5	27928369	33383992	17244116	17086128	22283293	23585180	3154534
117.5	32668486	39661932	20598599	20864377	25547109	27868101	3670306
118.5	37766416	46287284	24400938	25154965	28984369	32518794	4181666
119.5	43138433	53106029	28635852	29940576	32545851	37473348	4666895
120.5	48679217	59943053	33264847	35177743	36175463	42648065	5105078
121.5	54266611	66610463	38224939	40794525	39812474	47941802	5477724
122.5	59768212	72917063	43429421	46690252	43393948	53239779	5770163
123.5	65049156	78678361	48770839	52737737	46857226	58418664	5972600
124.5	69980285	83726455	54126006	58788086	50142255	63352618	6080700
125.5	74445826	87919076	59362615	64677914	53193665	67919819	6095713
126.5	78349788	91147113	64346774	70238428	55962482	72008917	6024153
127.5	81620480	93340037	68950689	75305549	58407455	75524842	5877119
128.5	84212865	94468762	73059729	79730085	60495970	78393482	5669375
129.5	86108697	94545746	76578234	83386913	62204585	80564835	5418285
130.5	87314714	93622349	79433636	86182258	63519199	82014431	5142673
131.5	87859295	91783771	81578707	88058414	64434908	82743019	4861622
132.5	87788124	89142098	82991959	88995553	64955583	82774663	4593176
133.5	87159402	85828173	83676418	89010652	65093202	82153570	4352906
134.5	86039094	81983054	83657120	88153876	64866991	80940027	4152428
135.5	84496579	77749815	82977698	86502992	64302394	79205896	3998124
136.5	82600977	73266318	81696488	84156528	63429926	77030047	3890544
137.5	80418275	68659388	79882462	81226433	62283943	74494100	3824829
138.5	78009273	64040648	77611312	77830911	60901385	71678706	3792177
139.5	75428317	59504025	74961856	74087970	59320533	68660540	3781824
140.5	72722700	55124813	72012919	70110062	57579826	65510064	3782931
141.5	69932612	50960035	68840757	66000022	55716786	62290043	3785905
142.5	67091494	47049772	65517026	61848327	53767085	59054741	3783076
143.5	64226673	43419162	62107295	57731597	51763778	55849701	3768857
144.5	61360162	40080733	58670055	53712172	49736714	52711967	3739590
145.5	58509534	37036843	55256158	49838529	47712140	49670641	3693242
146.5	55688788	34282020	51908630	46146319	45712478	46747647	3629082
147.5	52909159	31805089	48662789	42659803	43756262	43958620	3547376
148.5	50179838	29590996	45546601	39393492	41858219	41313829	3449140
149.5	47508565	27622325	42581210	36353841	40029456	38819080	3335945
150.5	44902103	25880485	39781600	33540884	38277737	36476562	3209769
151.5	42366574	24346620	37157314	30949741	36607810	34285612	3072888
152.5	39907675	23002264	34713225	28571933	35021772	32243374	2927787
153.5	37530792	21829782	32450279	26396514	33519450	30345363	2777088
154.5	35241015	20812654	30366227	24410994	32098768	28585931	2623486
155.5	33043092	19935620	28456293	22602075	30756114	26958639	2469684
156.5	30941331	19184737	26713778	20956227	29486675	25456550	2318339
157.5	28939486	18547362	25130593	19460110	28284752	24072461	2171998
158.5	27040630	18012092	23697708	18100877	27144049	22799071	2033045
159.5	25247052	17568666	22405531	16866382	26057934	21629113	1903649
160.5	23560167	17207864	21244206	15745300	25019675	20555442	1785720
161.5	21980474	16921379	20203853	14727197	24022660	19571113	1680867
162.5	20507543	16701702	19274739	13802545	23060581	18669422	1590374
163.5	19140041	16542001	18447401	12962711	22127610	17843953	1515178
164.5	17875794	16436007	17712729	12199918	21218545	17088599	1455863
165.5	16711875	16377907	17062006	11507192	20328929	16397582	1412658
166.5	15644713	16362245	16486925	10878300	19455144	15765466	1385448
167.5	14670212	16383831	15979589	10307688	18594476	15187159	1373795
168.5	13783879	16437656	15532481	9790408	17745142	14657913	1376951
169.5	12980943	16518828	15138445	9322056	16906284	14173311	1393888
170.5	12256472	16622500	14790649	8898709	16077928	13729252	1423323
171.5	11605473	16743825	14482554	8516866	15260906	13321925	1463744
172.5	11022982	16877916	14207881	8173394	14456747	12947784	1513447
173.5	10504133	17019812	13960597	7865479	13667551	12603514	1570572
174.5	10044211	17164471	13734898	7590584	12895830	12285999	1633145
175.5	9638696	17306769	13525207	7346403	12144357	11992286	1699122
176.5	9283280	17441510	13326191	7130832	11415997	11719562	1766437
177.5	8973884	17563464	13132780	6941931	10713565	11465125	1833047
178.5	8706654	17667409	12940210	6777895	10039686	11226371	1896976
179.5	8477953	17748201	12744061	6637025	9396682	11000784	1956360
180.5	8284344	17800844	12540321	6517704	8786491	10785941	2009482
181.5	8122567	17820587	12325439	6418368	8210606	10579513	2054809
182.5	7989515	17803025	12096391	6337485	7670048	10379293	2091022
183.5	7882208	17744204	11850733	6273528	7165362	10183207	2117037
184.5	7797763	17640734	11586652	6224958	6696636	9989349	2132026
185.5	7733367	17489896	11303001	6190199	6263541	9796001	2135434
186.5	7686260	17289735	10999318	6167623	5865379	9601663	2126983
187.5	7653711	17039150	10675827	6155529	5501140	9405071	2106673
188.5	7633009	16737950	10333415	6152138	5169567	9205216	2074783
189.5	7621454	16386896	9973586	6155580	4869216	9001347	2031854
190.5	7616362	15987703	9598399	6163897	4598514	8792975	1978671
191.5	7615071	15543020	9210381	6175044	4355811	8579865	1916242
192.5	7614962	15056371	8812432	6186905	4139426	8362019	1845762
193.5	7613483	14532067	8407714	6197315	3947689	8139654	1768572
194.5	7608185	13975091	7999540	6204087	3778964	7913173	1686120
195.5	7596755	13390956	7591263	6205054	3631676	7683141	1599909
196.5	7577065	12785552	7186166	6198114	3504327	7450245	1511447
197.5	7547213	12164980	6787375	6181280	3395500	7215270	1422193
198.5	7505563	11535384	6397774	6152737	3303871	6979066	1333511
199.5	7450791	10902792	6019943	6110898	3228196	6742524	1246616
200.5	7381910	10272967	5656114	6054454	3167317	6506552	1162546
201.5	7298301	9651277	5308145	5982427	3120144	6272059	1082125
202.5	7199719	9042594	4977511	5894202	3085649	6039935	1005953
203.5	7086297	8451208	4665309	5789557	3062851	5811044	934411
204.5	6958537	7880780	4372275	5668672	3050800	5586213	867671
205.5	6817277	7334313	4098819	5532125	3048563	5366220	805739
206.5	6663667	6814155	3845058	5380871	3055206	5151791	748496
207.5	6499114	6322012	3610853	5216206	3069781	4943593	695750
208.5	6325235	5858995	3395861	5039719	3091310	4742224	647295
209.5	6143803	5425666	3199569	4853231	3118775	4548209	602951
210.5	5956682	5022103	3021341	4658730	3151103	4361992	562603
211.5	5765780	4647964	2860452	4458299	3187167	4183932	526212
212.5	5572987	4302562	2716124	4254051	3225780	4014301	493817
213.5	5380136	3984926	2587558	4048063	3265699	3853276	465503
214.5	5188957	3693871	2473954	3842317	3305633	3700946	441361
215.5	5001048	3428056	2374536	3638654	3344258	3557311	421429
216.5	4817853	3186036	2288570	3438736	3380239	3422287	405634
217.5	4640644	2966309	2215372	3244020	3412253	3295720	393747
218.5	4470513	2767355	2154323	3055743	3439018	3177390	385371
219.5	4308375	2587664	2104872	2874914	3459330	3067031	379953
220.5	4154971	2425768	2066543	2702321	3472094	2964339	376840
221.5	4010879	2280252	2038935	2538542	3476360	2868993	375340
222.5	3876522	2149774	2021723	2383957	3471355	2780666	374790
223.5	3752189	2033069	2014657	2238774	3456508	2699039	374608
224.5	3638048	1928956	2017558	2103045	3431474	2623816	374337
225.5	3534163	1836344	2030313	1976696	3396145	2554732	373663
226.5	3440506	1754222	2052869	1859545	3350655	2491559	372431
227.5	3356978	1681666	2085226	1751327	3295371	2434114	370644
228.5	3283412	1617828	2127425	1651713	3230881	2382252	368458
229.5	3219591	1561938	2179538	1560329	3157970	2335873	366175
230.5	3165251	1513290	2241652	1476770	3077585	2294910	364225
231.5	3120089	1471241	2313850	1400618	2990807	2259321	363140
232.5	3083763	1435205	2396197	1331449	2898803	2229083	363519
233.5	3055893	1404643	2488709	1268844	2802792	2204176	365979
234.5	3036057	1379060	2591330	1212395	2704004	2184569	371097
235.5	3023791	1357995	2703904	1161714	2603645	2170210	379345
236.5	3018574	1341017	2826140	1116432	2502867	2161006	391038
237.5	3019824	1327721	2957578	1076207	2402740	2156814	406300
238.5	3026888	1317720	3097554	1040721	2304233	2157423	425059
239.5	3039024	1310639	3245168	1009684	2208203	2162544	447057
240.5	3055397	1306115	3399246	982833	2115388	2171796	471890
241.5	3075057	1303789	3558318	959933	2026399	2184699	499033
242.5	3096940	1303306	3720596	940774	1941731	2200669	527879
243.5	3119851	1304310	3883964	925172	1861765	2219012	557759
244.5	3142463	1306444	4045982	912969	1786774	2238927	587961
245.5	3163321	1309352	4203909	904027	1716941	2259510	617741
246.5	3180852	1312672	4354738	898231	1652364	2279771	646336
247.5	3193378	1316046	4495258	895484	1593072	2298648	672973
248.5	3199151	1319115	4622130	895710	1539034	2315028	696881
249.5	3196390	1321528	4731991	898845	1490172	2327785	717311
250.5	3183334	1322941	4821562	904841	1446368	2335809	733551
251.5	3158303	1323027	4887779	913660	1407478	2338049	744952
252.5	3119775	1321477	4927925	925273	1373332	2333557	750949
253.5	3066460	1318006	4939757	939658	1343745	2321525	751090
254.5	2997385	1312362	4921628	956795	1318519	2301338	745057
255.5	2911970	1304329	4872585	976661	1297448	2272598	732688
256.5	2810096	1293731	4792444	999232	1280315	2235164	713995
257.5	2692162	1280440	4681829	1024471	1266902	2189161	689175
258.5	2559107	1264378	4542169	1052331	1256979	2134993	658612
259.5	2412420	1245517	4375665	1082742	1250313	2073332	622881
260.5	2254102	1223882	4185208	1115613	1246659	2005093	582735
261.5	2086606	1199551	3974267	1150820	1245762	1931401	539092
262.5	1912741	1172651	3746751	1188203	1247356	1853540	493026
263.5	1735548	1143354	3506850	1227560	1251158	1772894	445753
264.5	1558168	1111876	3258869	1268642	1256868	1690885	398629
265.5	1383683	1078466	3007064	1311144	1264170	1608905	353160
266.5	1214984	1043401	2755492	1354705	1272726	1528261	311026
267.5	1054632	1006980	2507878	1398902	1282180	1450114	274086
268.5	904759	969515	2267515	1443251	1292156	1375439	244300
269.5	766996	931322	2037187	1487204	1302262	1304994	223426
270.5	642437	892715	1819131	1530154	1312093	1239306	212423
271.5	531638	853999	1615023	1571443	1321235	1178668	210839
272.5	434655	815465	1425996	1610366	1329271	1123150	216827
273.5	351105	777383	1252674	1646186	1335787	1072627	227860
274.5	280243	739999	1095234	1678151	1340385	1026802	241545
275.5	221059	703531	953465	1705509	1342687	985250	256017
276.5	172366	668170	826840	1727529	1342347	947451	269978
277.5	132888	634077	714592	1743529	1339061	912829	282581
278.5	101334	601383	615778	1752892	1332575	880793	293302
279.5	76459	570190	529344	1755096	1322695	850757	301837
280.5	57109	540575	454175	1749732	1309293	822177	308034
281.5	42248	512588	389144	1736527	1292309	794563	311841
282.5	30972	486259	333148	1715355	1271759	767499	313284
283.5	22516	461595	285129	1686252	1247732	740645	312441
284.5	16241	438590	244099	1649421	1220386	713747	309432
285.5	11633	417220	209149	1605224	1189947	686635	304412
286.5	8281	397452	179455	1554181	1156698	659213	297562
287.5	5862	379244	154279	1496950	1120974	631462	289083
288.5	4131	362547	132969	1434311	1083146	603421	279196
289.5	2901	347305	114955	1367135	1043615	575182	268129
290.5	2031	333463	99741	1296362	1002796	546879	256118
291.5	1420	320963	86899	1222967	961108	518671	243398
292.5	991	309747	76063	1147930	918963	490739	230200
293.5	693	299760	66921	1072207	876755	463267	216746
294.5	485	290947	59210	996707	834854	436441	203244
295.5	340	283259	52706	922266	793596	410433	189882
296.5	239	276648	47222	849628	753281	385403	176831
297.5	169	271071	42601	779437	714168	361489	164238
298.5	120	266490	38712	712228	676477	338805	152227
299.5	86	262870	35447	648423	640382	317442	140899
300.5	62	260183	32715	588331	606021	297462	130334
301.5	45	258403	30441	532160	573490	278908	120589
302.5	33	257510	28565	480020	542855	261797	111703
303.5	25	257489	27037	431936	514147	246127	103696
304.5	18	258326	25817	387860	487373	231879	96573
305.5	14	260015	24872	347683	462515	219020	90328
306.5	11	262551	24178	311247	439537	207505	84939
307.5	8	265933	23717	278360	418389	197281	80379
308.5	7	270163	23477	248802	399006	188291	76609
309.5	5	275244	23450	222339	381318	180471	73586
310.5	4	281182	23634	198729	365248	173760	71260
311.5	4	287985	24031	177730	350713	168093	69579
312.5	3	295659	24648	159105	337632	163409	68490
313.5	3	304211	25498	142625	325920	159651	67940
314.5	2	313647	26597	128073	315494	156763	67878
315.5	2	323969	27967	115248	306274	154692	68255
316.5	2	335178	29637	103962	298178	153391	69028
317.5	2	347269	31642	94045	291129	152817	70154
318.5	2	360232	34022	85341	285051	152930	71598
319.5	2	374049	36828	77712	279868	153692	73324
320.5	2	388695	40117	71031	275507	155070	75302
321.5	2	404134	43957	65188	271893	157035	77502
322.5	2	420321	48426	60085	268952	159557	79896
323.5	2	437195	53612	55635	266610	162611	82456
324.5	2	454686	59616	51762	264787	166171	85153
325.5	2	472707	66552	48400	263405	170213	87961
326.5	2	491154	74544	45493	262379	174714	90850
327.5	3	509911	83731	42989	261621	179651	93793
328.5	3	528842	94260	40848	261038	184998	96759
329.5	4	547796	106290	39032	260534	190731	99722
330.5	4	566606	119983	37510	260006	196822	102653
331.5	5	585089	135504	36257	259348	203241	105530
332.5	6	603050	153014	35251	258451	209955	108332
333.5	8	620282	172660	34475	257204	216926	111045
334.5	10	636567	194566	33915	255496	224111	113660
335.5	13	651682	218825	33559	253219	231459	116179
336.5	16	665403	245477	33402	250271	238914	118611
337.5	21	677505	274504	33437	246559	246405	120975
338.5	27	687770	305806	33663	242003	253854	123295
339.5	36	695990	339190	34079	236540	261167	125603
340.5	48	701973	374351	34690	230127	268238	127928
341.5	64	705548	410866	35500	222744	274944	130290
342.5	86	706567	448181	36516	214400	281150	132698
343.5	117	704913	485611	37749	205130	286704	135135
344.5	159	700504	522350	39211	194998	291444	137553
345.5	216	693293	557484	40916	184098	295201	139873
346.5	295	683275	590016	42881	172549	297803	141979
347.5	404	670486	618908	45125	160494	299083	143725
348.5	553	655004	643121	47668	148092	298888	144943
349.5	756	636950	661673	50536	135515	297086	145454
350.5	1035	616486	673695	53752	122941	293582	145082
351.5	1414	593811	678490	57343	110545	288321	143671
352.5	1927	569160	675586	61338	98494	281301	141098
353.5	2619	542796	664778	65765	86939	272579	137286
354.5	3548	515007	646161	70655	76010	262276	132211
355.5	4786	486099	620138	76034	65815	250574	125909
356.5	6426	456387	587407	81932	56432	237717	118475
357.5	8583	426192	548936	88370	47911	223998	110062
358.5	11397	395830	505904	95369	40276	209755	100867
359.5	15038	365608	459641	102943	33524	195351	91125
360.5	19708	335815	411546	111097	27630	181159	81100
361.5	25641	306719	363011	119826	22551	167550	71068
362.5	33104	278561	315342	129111	18229	154869	61324
363.5	42395	251549	269691	138921	14596	143430	52181
364.5	53836	225860	227010	149202	11579	133497	44007
365.5	67763	201634	188015	159884	9103	125280	37261
366.5	84516	178976	153176	170873	7094	118927	32533
367.5	104419	157957	122723	182048	5483	114526	30418
368.5	127761	138613	96671	193266	4203	112103	31158
369.5	154769	120949	74850	204357	3198	111625	34392
370.5	185582	104944	56954	215126	2415	113004	39454
371.5	220223	90551	42579	225355	1812	116104	45770
372.5	258572	77705	31270	234812	1351	120742	52972
373.5	300345	66321	22555	243248	1002	126694	60839
374.5	345073	56307	15976	250414	739	133702	69220
375.5	392100	47558	11110	256063	543	141475	77981
376.5	440582	39967	7584	259965	398	149699	86977
377.5	489502	33424	5082	261914	290	158042	96038
378.5	537703	27821	3342	261747	211	166165	104969
379.5	583928	23053	2156	259347	154	173728	113548
380.5	626869	19020	1365	254657	112	180405	121542
381.5	665232	15629	848	247690	81	185896	128713
382.5	697800	12793	517	238527	59	189939	134833
383.5	723497	10435	309	227324	43	192322	139695
384.5	741450	8483	181	214307	31	192890	143128
385.5	751034	6876	104	199762	23	191560	145005
386.5	751913	5559	59	184027	17	188315	145251
387.5	744055	4483	32	167475	13	183212	143849
388.5	727737	3608	18	150498	9	176374	140841
389.5	703526	2900	9	133485	7	167985	136323
390.5	672246	2327	5	116807	5	158278	130442
391.5	634931	1867	2	100800	4	147521	123387
392.5	592764	1496	1	85748	3	136003	115378
393.5	547023	1200	0	71877	2	124020	106653
394.5	499007	962	0	59344	2	111863	97459
395.5	449983	772	0	48241	2	99799	88038
396.5	401128	621	0	38596	1	88069	78617
397.5	353492	500	0	30380	0	76875	69401
398.5	307960	404	0	23518	0	66377	60565
399.5	265240	327	0	17899	0	56693	52250
400.5	225850	265	0	13388	0	47901	44562
401.5	190128	216	0	9838	0	40037	37571
402.5	158243	177	0	7101	0	33104	31315
403.5	130216	146	0	5032	0	27079	25802
404.5	105942	120	0	3500	0	21912	21018
405.5	85219	100	0	2389	0	17542	16926
406.5	67776	84	0	1599	0	13892	13474
407.5	53295	71	0	1050	0	10883	10605
408.5	41435	60	0	676	0	8434	8251
409.5	31850	51	0	427	0	6466	6347
410.5	24206	44	0	264	0	4903	4826
411.5	18188	38	0	160	0	3677	3628
412.5	13512	34	0	95	0	2728	2696
413.5	9924	30	0	55	0	2002	1981
414.5	7206	27	0	31	0	1453	1438
415.5	5172	24	0	18	0	1043	1032
416.5	3670	22	0	10	0	740	732
417.5	2575	20	0	5	0	520	514
418.5	1785	19	0	3	0	362	356
419.5	1224	18	0	1	0	249	244
420.5	829	17	0	0	1	170	165
421.5	555	16	0	0	1	115	110
422.5	367	16	0	0	2	77	73
423.5	240	15	0	0	2	52	47
424.5	155	15	0	0	3	35	30
425.5	99	15	0	0	4	24	19
426.5	63	16	0	0	5	17	12
427.5	39	16	0	0	7	12	7
428.5	24	17	0	0	9	10	5
429.5	15	18	0	0	13	9	4
430.5	9	19	0	0	18	9	4
431.5	5	20	0	0	25	10	5
432.5	3	22	0	0	35	12	7
433.5	2	24	0	0	49	15	10
434.5	1	27	0	0	70	20	14
435.5	0	30	0	0	99	26	19
436.5	0	34	0	0	140	35	27
437.5	0	39	0	0	200	48	39
438.5	0	45	0	0	284	66	55
439.5	0	52	0	0	404	91	79
440.5	0	61	0	0	574	127	112
441.5	0	72	0	0	813	177	160
442.5	0	85	0	0	1146	246	226
443.5	0	101	0	0	1609	342	317
444.5	0	121	0	0	2246	473	444
445.5	0	146	0	0	3114	652	616
446.5	0	177	0	0	4284	892	849
447.5	0	216	0	0	5845	1212	1159
448.5	0	264	0	0	7899	1633	1567
449.5	0	323	0	0	10566	2178	2098
450.5	0	397	0	0	13977	2875	2777
451.5	0	488	0	0	18269	3751	3631
452.5	0	602	0	0	23575	4835	4686
453.5	0	742	0	0	30013	6151	5967
454.5	0	916	0	0	37664	7716	7489
455.5	0	1130	0	0	46559	9538	9258
456.5	0	1393	0	0	56651	11609	11264
457.5	0	1716	0	0	67804	13904	13479
458.5	0	2110	0	0	79771	16376	15854
459.5	0	2589	0	0	92193	18956	18316
460.5	0	3168	0	0	104602	21554	20771
461.5	0	3865	0	0	116443	24062	23107
462.5	0	4699	0	0	127105	26361	25202
463.5	0	5689	0	0	135971	28332	26932
464.5	0	6859	0	0	142473	29867	28183
465.5	0	8231	0	0	146151	30876	28863
466.5	0	9826	0	0	146704	31306	28912
467.5	0	11667	0	0	144027	31139	28312
468.5	0	13773	0	0	138234	30401	27090
469.5	0	16160	0	0	129650	29162	25316
470.5	0	18841	0	0	118778	27524	23103
471.5	0	21822	0	0	106252	25615	20597
472.5	0	25102	0	0	92771	23575	17969
473.5	0	28672	0	0	79034	21541	15408
474.5	0	32512	0	0	65675	19637	13119
475.5	0	36593	0	0	53213	17961	11309
476.5	0	40875	0	0	42030	16581	10155
477.5	0	45307	0	0	32350	15531	9729
478.5	0	49829	0	0	24259	14818	9934
479.5	0	54372	0	0	17719	14418	10561
480.5	0	58859	0	0	12602	14292	11406
481.5	0	63211	0	0	8726	14387	12322
482.5	0	67343	0	0	5881	14645	13224
483.5	0	71175	0	0	3858	15007	14062
484.5	0	74630	0	0	2462	15418	14811
485.5	0	77636	0	0	1528	15833	15454
486.5	0	80134	0	0	923	16211	15982
487.5	0	82074	0	0	542	16523	16388
488.5	0	83424	0	0	309	16747	16669
489.5	0	84162	0	0	172	16867	16824
490.5	0	84287	0	0	93	16876	16853
491.5	0	83808	0	0	49	16771	16759
492.5	0	82751	0	0	25	16555	16549
493.5	0	81155	0	0	12	16233	16230
494.5	0	79069	0	0	6	15815	15813
495.5	0	76549	0	0	3	15310	15310
496.5	0	73660	0	0	1	14732	14732
497.5	0	70468	0	0	0	14094	14094
498.5	0	67040	0	0	0	13408	13408
499.5	0	63444	0	0	0	12689	12689
500.5	0	59743	0	0	0	11949	11949
501.5	0	55996	0	0	0	11199	11199
502.5	0	52255	0	0	0	10451	10451
503.5	0	48569	0	0	0	9714	9714
504.5	0	44976	0	0	0	8995	8995
505.5	0	41509	0	0	0	8302	8302
506.5	0	38194	0	0	0	7639	7639
507.5	0	35050	0	0	0	7010	7010
508.5	0	32091	0	0	0	6418	6418
509.5	0	29324	0	0	0	5865	5865
510.5	0	26753	0	0	0	5351	5351
511.5	0	24377	0	0	0	4875	4875
512.5	0	22192	0	0	0	4438	4438
513.5	0	20192	0	0	0	4038	4038
514.5	0	18369	0	0	0	3674	3674
515.5	0	16714	0	0	0	3343	3343
516.5	0	15216	0	0	0	3043	3043
517.5	0	13864	0	0	0	2773	2773
518.5	0	12647	0	0	0	2529	2529
519.5	0	11554	0	0	0	2311	2311
520.5	0	10575	0	0	0	2115	2115
521.5	0	9701	0	0	0	1940	1940
522.5	0	8920	0	0	0	1784	1784
523.5	0	8224	0	0	0	1645	1645
524.5	0	7606	0	0	0	1521	1521
525.5	0	7057	0	0	0	1411	1411
526.5	0	6571	0	0	0	1314	1314
527.5	0	6142	0	0	0	1228	1228
528.5	0	5764	0	0	0	1153	1153
529.5	0	5432	0	0	0	1086	1086
530.5	0	5141	0	0	0	1028	1028
531.5	0	4888	0	0	0	978	978
532.5	0	4670	0	0	0	934	934
533.5	0	4484	0	0	0	897	897
534.5	0	4326	0	0	0	865	865
535.5	0	4196	0	0	0	839	839
536.5	0	4090	0	0	0	818	818
537.5	0	4009	0	0	0	802	802
538.5	0	3950	0	0	0	790	790
539.5	0	3913	0	0	0	783	783
540.5	0	3897	0	0	0	779	779
541.5	0	3902	0	0	0	780	780
542.5	0	3928	0	0	0	786	786
543.5	0	3975	0	0	0	795	795
544.5	0	4045	0	0	0	809	809
545.5	0	4137	0	0	0	827	827
546.5	0	4253	0	0	0	851	851
547.5	0	4394	0	0	0	879	879
548.5	0	4561	0	0	0	912	912
549.5	0	4758	0	0	0	952	952
550.5	0	4986	0	0	0	997	997
551.5	0	5248	0	0	0	1050	1050
552.5	0	5547	0	0	0	1109	1109
553.5	0	5887	0	0	0	1177	1177
554.5	0	6272	0	0	0	1254	1254
555.5	0	6706	0	0	0	1341	1341
556.5	0	7193	0	0	0	1439	1439
557.5	0	7740	0	0	0	1548	1548
558.5	0	8353	0	0	0	1671	1671
559.5	0	9036	0	0	0	1807	1807
560.5	0	9799	0	0	0	1960	1960
561.5	0	10646	0	0	0	2129	2129
562.5	0	11586	0	0	0	2317	2317
563.5	0	12627	0	0	0	2525	2525
564.5	0	13775	0	0	0	2755	2755
565.5	0	15040	0	0	0	3008	3008
566.5	0	16427	0	0	0	3285	3285
567.5	0	17944	0	0	0	3589	3589
568.5	0	19596	0	0	0	3919	3919
569.5	0	21388	0	0	0	4278	4278
570.5	0	23322	0	0	0	4664	4664
571.5	0	25399	0	0	0	5080	5080
572.5	0	27616	0	0	0	5523	5523
573.5	0	29968	0	0	0	5994	5994
574.5	0	32446	0	0	0	6489	6489
575.5	0	35036	0	0	0	7007	7007
576.5	0	37720	0	0	0	7544	7544
577.5	0	40474	0	0	0	8095	8095
578.5	0	43270	0	0	0	8654	8654
579.5	0	46074	0	0	0	9215	9215
580.5	0	48846	0	0	0	9769	9769
581.5	0	51544	0	0	0	10309	10309
582.5	0	54119	0	0	0	10824	10824
583.5	0	56519	0	0	0	11304	11304
584.5	0	58693	0	0	0	11739	11739
585.5	0	60586	0	0	0	12117	12117
586.5	0	62149	0	0	0	12430	12430
587.5	0	63332	0	0	0	12666	12666
588.5	0	64094	0	0	0	12819	12819
589.5	0	64399	0	0	0	12880	12880
590.5	0	64222	0	0	0	12844	12844
591.5	0	63549	0	0	0	12710	12710
592.5	0	62379	0	0	0	12476	12476
593.5	0	60721	0	0	0	12144	12144
594.5	0	58601	0	0	0	11720	11720
595.5	0	56056	0	0	0	11211	11211
596.5	0	53135	0	0	0	10627	10627
597.5	0	49896	0	0	0	9979	9979
598.5	0	46406	0	0	0	9281	9281
599.5	0	42737	0	0	0	8547	8547
600.5	0	38963	0	0	0	7793	7793
601.5	0	35159	0	0	0	7032	7032
602.5	0	31394	0	0	0	6279	6279
603.5	0	27733	0	0	0	5547	5547
604.5	0	24233	0	0	0	4847	4847
605.5	0	20940	0	0	0	4188	4188
606.5	0	17891	0	0	0	3578	3578
607.5	0	15112	0	0	0	3022	3022
608.5	0	12616	0	0	0	2523	2523
609.5	0	10408	0	0	0	2082	2082
610.5	0	8484	0	0	0	1697	1697
611.5	0	6832	0	0	0	1366	1366
612.5	0	5434	0	0	0	1087	1087
613.5	0	4269	0	0	0	854	854
614.5	0	3312	0	0	0	662	662
615.5	0	2537	0	0	0	507	507
616.5	0	1918	0	0	0	384	384
617.5	0	1432	0	0	0	286	286
618.5	0	1055	0	0	0	211	211
619.5	0	767	0	0	0	153	153
620.5	0	550	0	0	0	110	110
621.5	0	389	0	0	0	78	78
622.5	0	272	0	0	0	54	54
623.5	0	187	0	0	0	37	37
624.5	0	127	0	0	0	25	25
625.5	0	85	0	0	0	17	17
626.5	0	56	0	0	0	11	11
627.5	0	37	0	0	0	7	7
628.5	0	24	0	0	0	5	5
629.5	0	15	0	0	0	3	3
630.5	0	9	0	0	0	2	2
631.5	0	6	0	0	0	1	1
632.5	0	4	0	0	0	0	0
633.5	0	2	0	0	0	0	0
634.5	0	1	0	0	0	0	0
635.5	0	0	0	0	0	0	0
636.5	0	0	0	0	0	0	0
637.5	0	0	0	0	0	0	0
638.5	0	0	0	0	0	0	0
639.5	0	0	0	0	0	0	0
640.5	0	0	0	0	0	0	0
641.5	0	0	0	0	0	0	0
642.5	0	0	0	0	0	0	0
643.5	0	0	0	0	0	0	0
644.5	0	0	0	0	0	0	0
645.5	0	0	0	0	0	0	0
646.5	0	0	0	0	0	0	0
647.5	0	0	0	0	0	0	0
648.5	0	0	0	0	0	0	0
649.5	0	0	0	0	0	0	0
650.5	0	0	0	0	0	0	0
651.5	0	0	0	0	0	0	0
652.5	0	0	0	0	0	0	0
653.5	0	0	0	0	0	0	0
654.5	0	0	0	0	0	0	0
655.5	0	0	0	0	0	0	0
656.5	0	0	0	0	0	0	0
657.5	0	0	0	0	0	0	0
658.5	0	0	0	0	0	0	0
659.5	0	0	0	0	0	0	0
660.5	0	0	0	0	0	0	0
661.5	0	0	0	0	0	0	0
662.5	0	0	0	0	0	0	0
663.5	0	0	0	0	0	0	0
664.5	0	0	0	0	0	0	0
665.5	0	0	0	0	0	0	0
666.5	0	0	0	0	0	0	0
667.5	0	0	0	0	0	0	0
668.5	0	0	0	0	0	0	0
669.5	0	0	0	0	0	0	0
670.5	0	0	0	0	0	0	0
671.5	0	0	0	0	0	0	0
672.5	0	0	0	0	0	0	0
673.5	0	0	0	0	0	0	0
674.5	0	0	0	0	0	0	0
675.5	0	0	0	0	0	0	0
676.5	0	0	0	0	0	0	0
677.5	0	0	0	0	0	0	0
678.5	0	0	0	0	0	0	0
679.5	0	0	0	0	0	0	0
680.5	0	0	0	0	0	0	0
681.5	0	0	0	0	0	0	0
682.5	0	0	0	0	0	0	0
683.5	0	0	0	0	0	0	0
684.5	0	0	0	0	0	0	0
685.5	0	0	0	0	0	0	0
686.5	0	0	0	0	0	0	0
687.5	0	0	0	0	0	0	0
688.5	0	0	0	0	0	0	0
689.5	0	0	0	0	0	0	0
690.5	0	0	0	0	0	0	0
691.5	0	0	0	0	0	0	0
692.5	0	0	0	0	0	0	0
693.5	0	0	0	0	0	0	0
694.5	0	0	0	0	0	0	0
695.5	0	0	0	0	0	0	0
696.5	0	0	0	0	0	0	0
697.5	0	0	0	0	0	0	0
698.5	0	0	0	0	0	0	0
699.5	0	0	0	0	0	0	0
700.5	0	0	0	0	0	0	0
701.5	0	0	0	0	0	0	0
702.5	0	0	0	0	0	0	0
703.5	0	0	0	0	0	0	0
704.5	0	0	0	0	0	0	0
705.5	0	0	0	0	0	0	0
706.5	0	0	0	0	0	0	0
707.5	0	0	0	0	0	0	0
708.5	0	0	0	0	0	0	0
709.5	0	0	0	0	0	0	0
710.5	0	0	0	0	0	0	0
711.5	0	0	0	0	0	0	0
712.5	0	0	0	0	0	0	0
713.5	0	0	0	0	0	0	0
714.5	0	0	0	0	0	0	0
715.5	0	0	0	0	0	0	0
716.5	0	0	0	0	0	0	0
717.5	0	0	0	0	0	0	0
718.5	0	0	0	0	0	0	0
719.5	0	0	0	0	0	0	0
720.5	0	0	0	0	0	0	0
721.5	0	0	0	0	0	0	0
722.5	0	0	0	0	0	0	0
723.5	0	0	0	0	0	0	0
724.5	0	0	0	0	0	0	0
725.5	0	0	0	0	0	0	0
726.5	0	0	0	0	0	0	0
727.5	0	0	0	0	0	0	0
728.5	0	0	0	0	0	0	0
729.5	0	0	0	0	0	0	0
730.5	0	0	0	0	0	0	0
731.5	0	0	0	0	0	0	0
732.5	0	0	0	0	0	0	0
733.5	0	0	0	0	0	0	0
734.5	0	0	0	0	0	0	0
735.5	0	0	0	0	0	0	0
736.5	0	0	0	0	0	0	0
737.5	0	0	0	0	0	0	0
738.5	0	0	0	0	0	0	0
739.5	0	0	0	0	0	0	0
740.5	0	0	0	0	0	0	0
741.5	0	0	0	0	0	0	0
742.5	0	0	0	0	0	0	0
743.5	0	0	0	0	0	0	0
744.5	0	0	0	0	0	0	0
745.5	0	0	0	0	0	0	0
746.5	0	0	0	0	0	0	0
747.5	0	0	0	0	0	0	0
748.5	0	0	0	0	0	0	0
749.5	0	0	0	0	0	0	0
750.5	0	0	0	0	0	0	0
751.5	0	0	0	0	0	0	0
752.5	0	0	0	0	0	0	0
753.5	0	0	0	0	0	0	0
754.5	0	0	0	0	0	0	0
755.5	0	0	0	0	0	0	0
756.5	0	0	0	0	0	0	0
757.5	0	0	0	0	0	0	0
758.5	0	0	0	0	0	0	0
759.5	0	0	0	0	0	0	0
760.5	0	0	0	0	0	0	0
761.5	0	0	0	0	0	0	0
762.5	0	0	0	0	0	0	0
763.5	0	0	0	0	0	0	0
764.5	0	0	0	0	0	0	0
765.5	0	0	0	0	0	0	0
766.5	0	0	0	0	0	0	0
767.5	0	0	0	0	0	0	0
768.5	0	0	0	0	0	0	0
769.5	0	0	0	0	0	0	0
770.5	0	0	0	0	0	0	0
771.5	0	0	0	0	0	0	0
772.5	0	0	0	0	0	0	0
773.5	0	0	0	0	0	0	0
774.5	0	0	0	0	0	0	0
775.5	0	0	0	0	0	0	0
776.5	0	0	0	0	0	0	0
777.5	0	0	0	0	0	0	0
778.5	0	0	0	0	0	0	0
779.5	0	0	0	0	0	0	0
780.5	0	0	0	0	0	0	0
781.5	0	0	0	0	0	0	0
782.5	0	0	0	0	0	0	0
783.5	0	0	0	0	0	0	0
784.5	0	0	0	0	0	0	0
785.5	0	0	0	0	0	0	0
786.5	0	0	0	0	0	0	0
787.5	0	0	0	0	0	0	0
788.5	0	0	0	0	0	0	0
789.5	0	0	0	0	0	0	0
790.5	0	0	0	0	0	0	0
791.5	0	0	0	0	0	0	0
792.5	0	0	0	0	0	0	0
793.5	0	0	0	0	0	0	0
794.5	0	0	0	0	0	0	0
795.5	0	0	0	0	0	0	0
796.5	0	0	0	0	0	0	0
797.5	0	0	0	0	0	0	0
798.5	0	0	0	0	0	0	0
799.5	0	0	0	0	0	0	0
800.5	0	0	0	0	0	0	0
801.5	0	0	0	0	0	0	0
802.5	0	0	0	0	0	0	0
803.5	0	0	0	0	0	0	0
804.5	0	0	0	0	0	0	0
805.5	0	0	0	0	0	0	0
806.5	0	0	0	0	0	0	0
807.5	0	0	0	0	0	0	0
808.5	0	0	0	0	0	0	0
809.5	0	0	0	0	0	0	0
810.5	0	0	0	0	0	0	0
811.5	0	0	0	0	0	0	0
812.5	0	0	0	0	0	0	0
813.5	0	0	0	0	0	0	0
814.5	0	0	0	0	0	0	0
815.5	0	0	0	0	0	0	0
816.5	0	0	0	0	0	0	0
817.5	0	0	0	0	0	0	0
818.5	0	0	0	0	0	0	0
819.5	0	0	0	0	0	0	0
820.5	0	0	0	0	0	0	0
821.5	0	0	0	0	0	0	0
822.5	0	0	0	0	0	0	0
823.5	0	0	0	0	0	0	0
824.5	0	0	0	0	0	0	0
825.5	0	0	0	0	0	0	0
826.5	0	0	0	0	0	0	0
827.5	0	0	0	0	0	0	0
828.5	0	0	0	0	0	0	0
829.5	0	0	0	0	0	0	0
830.5	0	0	0	0	0	0	0
831.5	0	0	0	0	0	0	0
832.5	0	0	0	0	0	0	0
833.5	0	0	0	0	0	0	0
834.5	0	0	0	0	0	0	0
835.5	0	0	0	0	0	0	0
836.5	0	0	0	0	0	0	0
837.5	0	0	0	0	0	0	0
838.5	0	0	0	0	0	0	0
839.5	0	0	0	0	0	0	0
840.5	0	0	0	0	0	0	0
841.5	0	0	0	0	0	0	0
842.5	0	0	0	0	0	0	0
843.5	0	0	0	0	0	0	0
844.5	0	0	0	0	0	0	0
845.5	0	0	0	0	0	0	0
846.5	0	0	0	0	0	0	0
847.5	0	0	0	0	0	0	0
848.5	0	0	0	0	0	0	0
849.5	0	0	0	0	0	0	0
850.5	0	0	0	0	0	0	0
851.5	0	0	0	0	0	0	0
852.5	0	0	0	0	0	0	0
853.5	0	0	0	0	0	0	0
854.5	0	0	0	0	0	0	0
855.5	0	0	0	0	0	0	0
856.5	0	0	0	0	0	0	0
857.5	0	0	0	0	0	0	0
858.5	0	0	0	0	0	0	0
859.5	0	0	0	0	0	0	0
860.5	0	0	0	0	0	0	0
861.5	0	0	0	0	0	0	0
862.5	0	0	0	0	0	0	0
863.5	0	0	0	0	0	0	0
864.5	0	0	0	0	0	0	0
865.5	0	0	0	0	0	0	0
866.5	0	0	0	0	0	0	0
867.5	0	0	0	0	0	0	0
868.5	0	0	0	0	0	0	0
869.5	0	0	0	0	0	0	0
870.5	0	0	0	0	0	0	0
871.5	0	0	0	0	0	0	0
872.5	0	0	0	0	0	0	0
873.5	0	0	0	0	0	0	0
874.5	0	0	0	0	0	0	0
875.5	0	0	0	0	0	0	0
876.5	0	0	0	0	0	0	0
877.5	0	0	0	0	0	0	0
878.5	0	0	0	0	0	0	0
879.5	0	0	0	0	0	0	0
880.5	0	0	0	0	0	0	0
881.5	0	0	0	0	0	0	0
882.5	0	0	0	0	0	0	0
883.5	0	0	0	0	0	0	0
884.5	0	0	0	0	0	0	0
885.5	0	0	0	0	0	0	0
886.5	0	0	0	0	0	0	0
887.5	0	0	0	0	0	0	0
888.5	0	0	0	0	0	0	0
889.5	0	0	0	0	0	0	0
890.5	0	0	0	0	0	0	0
891.5	0	0	0	0	0	0	0
892.5	0	0	0	0	0	0	0
893.5	0	0	0	0	0	0	0
894.5	0	0	0	0	0	0	0
895.5	0	0	0	0	0	0	0
896.5	0	0	0	0	0	0	0
897.5	0	0	0	0	0	0	0
898.5	0	0	0	0	0	0	0
899.5	0	0	0	0	0	0	0
900.5	0	0	0	0	0	0	0
901.5	0	0	0	0	0	0	0
902.5	0	0	0	0	0	0	0
903.5	0	0	0	0	0	0	0
904.5	0	0	0	0	0	0	0
905.5	0	0	0	0	0	0	0
906.5	0	0	0	0	0	0	0
907.5	0	0	0	0	0	0	0
908.5	0	0	0	0	0	0	0
909.5	0	0	0	0	0	0	0
910.5	0	0	0	0	0	0	0
911.5	0	0	0	0	0	0	0
912.5	0	0	0	0	0	0	0
913.5	0	0	0	0	0	0	0
914.5	0	0	0	0	0	0	0
915.5	0	0	0	0	0	0	0
916.5	0	0	0	0	0	0	0
917.5	0	0	0	0	0	0	0
918.5	0	0	0	0	0	0	0
919.5	0	0	0	0	0	0	0
920.5	0	0	0	0	0	0	0
921.5	0	0	0	0	0	0	0
922.5	0	0	0	0	0	0	0
923.5	0	0	0	0	0	0	0
924.5	0	0	0	0	0	0	0
925.5	0	0	0	0	0	0	0
926.5	0	0	0	0	0	0	0
927.5	0	0	0	0	0	0	0
928.5	0	0	0	0	0	0	0
929.5	0	0	0	0	0	0	0
930.5	0	0	0	0	0	0	0
931.5	0	0	0	0	0	0	0
932.5	0	0	0	0	0	0	0
933.5	0	0	0	0	0	0	0
934.5	0	0	0	0	0	0	0
935.5	0	0	0	0	0	0	0
936.5	0	0	0	0	0	0	0
937.5	0	0	0	0	0	0	0
938.5	0	0	0	0	0	0	0
939.5	0	0	0	0	0	0	0
940.5	0	0	0	0	0	0	0
941.5	0	0	0	0	0	0	0
942.5	0	0	0	0	0	0	0
943.5	0	0	0	0	0	0	0
944.5	0	0	0	0	0	0	0
945.5	0	0	0	0	0	0	0
946.5	0	0	0	0	0	0	0
947.5	0	0	0	0	0	0	0
948.5	0	0	0	0	0	0	0
949.5	0	0	0	0	0	0	0
950.5	0	0	0	0	0	0	0
951.5	0	0	0	0	0	0	0
952.5	0	0	0	0	0	0	0
953.5	0	0	0	0	0	0	0
954.5	0	0	0	0	0	0	0
955.5	0	0	0	0	0	0	0
956.5	0	0	0	0	0	0	0
957.5	0	0	0	0	0	0	0
958.5	0	0	0	0	0	0	0
959.5	0	0	0	0	0	0	0
960.5	0	0	0	0	0	0	0
961.5	0	0	0	0	0	0	0
962.5	0	0	0	0	0	0	0
963.5	0	0	0	0	0	0	0
964.5	0	0	0	0	0	0	0
965.5	0	0	0	0	0	0	0
966.5	0	0	0	0	0	0	0
967.5	0	0	0	0	0	0	0
968.5	0	0	0	0	0	0	0
969.5	0	0	0	0	0	0	0
970.5	0	0	0	0	0	0	0
971.5	0	0	0	0	0	0	0
972.5	0	0	0	0	0	0	0
973.5	0	0	0	0	0	0	0
974.5	0	0	0	0	0	0	0
975.5	0	0	0	0	0	0	0
976.5	0	0	0	0	0	0	0
977.5	0	0	0	0	0	0	0
978.5	0	0	0	0	0	0	0
979.5	0	0	0	0	0	0	0
980.5	0	0	0	0	0	0	0
981.5	0	0	0	0	0	0	0
982.5	0	0	0	0	0	0	0
983.5	0	0	0	0	0	0	0
984.5	0	0	0	0	0	0	0
985.5	0	0	0	0	0	0	0
986.5	0	0	0	0	0	0	0
987.5	0	0	0	0	0	0	0
988.5	0	0	0	0	0	0	0
989.5	0	0	0	0	0	0	0
990.5	0	0	0	0	0	0	0
991.5	0	0	0	0	0	0	0
992.5	0	0	0	0	0	0	0
993.5	0	0	0	0	0	0	0
994.5	0	0	0	0	0	0	0
995.5	0	0	0	0	0	0	0
996.5	0	0	0	0	0	0	0
997.5	0	0	0	0	0	0	0
998.5	0	0	0	0	0	0	0
999.5	0	0	0	0	0	0	0
1000.5	0	0	0	0	0	0	0
1001.5	0	0	0	0	0	0	0
1002.5	0	0	0	0	0	0	0
1003.5	0	0	0	0	0	0	0
1004.5	0	0	0	0	0	0	0
1005.5	0	0	0	0	0	0	0
1006.5	0	0	0	0	0	0	0
1007.5	0	0	0	0	0	0	0
1008.5	0	0	0	0	0	0	0
1009.5	0	0	0	0	0	0	0
1010.5	0	0	0	0	0	0	0
1011.5	0	0	0	0	0	0	0
1012.5	0	0	0	0	0	0	0
1013.5	0	0	0	0	0	0	0
1014.5	0	0	0	0	0	0	0
1015.5	0	0	0	0	0	0	0
1016.5	0	0	0	0	0	0	0
1017.5	0	0	0	0	0	0	0
1018.5	0	0	0	0	0	0	0
1019.5	0	0	0	0	0	0	0
1020.5	0	0	0	0	0	0	0
1021.5	0	0	0	0	0	0	0
1022.5	0	0	0	0	0	0	0
1023.5	0	0	0	0	0	0	0
1024.5	0	0	0	0	0	0	0
1025.5	0	0	0	0	0	0	0
1026.5	0	0	0	0	0	0	0
1027.5	0	0	0	0	0	0	0
1028.5	0	0	0	0	0	0	0
1029.5	0	0	0	0	0	0	0
1030.5	0	0	0	0	0	0	0
1031.5	0	0	0	0	0	0	0
1032.5	0	0	0	0	0	0	0
1033.5	0	0	0	0	0	0	0
1034.5	0	0	0	0	0	0	0
1035.5	0	0	0	0	0	0	0
1036.5	0	0	0	0	0	0	0
1037.5	0	0	0	0	0	0	0
1038.5	0	0	0	0	0	0	0
1039.5	0	0	0	0	0	0	0
1040.5	0	0	0	0	0	0	0
1041.5	0	0	0	0	0	0	0
1042.5	0	0	0	0	0	0	0
1043.5	0	0	0	0	0	0	0
1044.5	0	0	0	0	0	0	0
1045.5	0	0	0	0	0	0	0
1046.5	0	0	0	0	0	0	0
1047.5	0	0	0	0	0	0	0
1048.5	0	0	0	0	0	0	0
1049.5	0	0	0	0	0	0	0
1050.5	0	0	0	0	0	0	0
1051.5	0	0	0	0	0	0	0
1052.5	0	0	0	0	0	0	0
1053.5	0	0	0	0	0	0	0
1054.5	0	0	0	0	0	0	0
1055.5	0	0	0	0	0	0	0
1056.5	0	0	0	0	0	0	0
1057.5	0	0	0	0	0	0	0
1058.5	0	0	0	0	0	0	0
1059.5	0	0	0	0	0	0	0
1060.5	0	0	0	0	0	0	0
1061.5	0	0	0	0	0	0	0
1062.5	0	0	0	0	0	0	0
1063.5	0	0	0	0	0	0	0
1064.5	0	0	0	0	0	0	0
1065.5	0	0	0	0	0	0	0
1066.5	0	0	0	0	0	0	0
1067.5	0	0	0	0	0	0	0
1068.5	0	0	0	0	0	0	0
1069.5	0	0	0	0	0	0	0
1070.5	0	0	0	0	0	0	0
1071.5	0	0	0	0	0	0	0
1072.5	0	0	0	0	0	0	0
1073.5	0	0	0	0	0	0	0
1074.5	0	0	0	0	0	0	0
1075.5	0	0	0	0	0	0	0
1076.5	0	0	0	0	0	0	0
1077.5	0	0	0	0	0	0	0
1078.5	0	0	0	0	0	0	0
1079.5	0	0	0	0	0	0	0
1080.5	0	0	0	0	0	0	0
1081.5	0	0	0	0	0	0	0
1082.5	0	0	0	0	0	0	0
1083.5	0	0	0	0	0	0	0
1084.5	0	0	0	0	0	0	0
1085.5	0	0	0	0	0	0	0
1086.5	0	0	0	0	0	0	0
1087.5	0	0	0	0	0	0	0
1088.5	0	0	0	0	0	0	0
1089.5	0	0	0	0	0	0	0
1090.5	0	0	0	0	0	0	0
1091.5	0	0	0	0	0	0	0
1092.5	0	0	0	0	0	0	0
1093.5	0	0	0	0	0	0	0
1094.5	0	0	0	0	0	0	0
1095.5	0	0	0	0	0	0	0
1096.5	0	0	0	0	0	0	0
1097.5	0	0	0	0	0	0	0
1098.5	0	0	0	0	0	0	0
1099.5	0	0	0	0	0	0	0
1100.5	0	0	0	0	0	0	0
1101.5	0	0	0	0	0	0	0
1102.5	0	0	0	0	0	0	0
1103.5	0	0	0	0	0	0	0
1104.5	0	0	0	0	0	0	0
1105.5	0	0	0	0	0	0	0
1106.5	0	0	0	0	0	0	0
1107.5	0	0	0	0	0	0	0
1108.5	0	0	0	0	0	0	0
1109.5	0	0	0	0	0	0	0
1110.5	0	0	0	0	0	0	0
1111.5	0	0	0	0	0	0	0
1112.5	0	0	0	0	0	0	0
1113.5	0	0	0	0	0	0	0
1114.5	0	0	0	0	0	0	0
1115.5	0	0	0	0	0	0	0
1116.5	0	0	0	0	0	0	0
1117.5	0	0	0	0	0	0	0
1118.5	0	0	0	0	0	0	0
1119.5	0	0	0	0	0	0	0
1120.5	0	0	0	0	0	0	0
1121.5	0	0	0	0	0	0	0
1122.5	0	0	0	0	0	0	0
1123.5	0	0	0	0	0	0	0
1124.5	0	0	0	0	0	0	0
1125.5	0	0	0	0	0	0	0
1126.5	0	0	0	0	0	0	0
1127.5	0	0	0	0	0	0	0
1128.5	0	0	0	0	0	0	0
1129.5	0	0	0	0	0	0	0
1130.5	0	0	0	0	0	0	0
1131.5	0	0	0	0	0	0	0
1132.5	0	0	0	0	0	0	0
1133.5	0	0	0	0	0	0	0
1134.5	0	0	0	0	0	0	0
1135.5	0	0	0	0	0	0	0
1136.5	0	0	0	0	0	0	0
1137.5	0	0	0	0	0	0	0
1138.5	0	0	0	0	0	0	0
1139.5	0	0	0	0	0	0	0
1140.5	0	0	0	0	0	0	0
1141.5	0	0	0	0	0	0	0
1142.5	0	0	0	0	0	0	0
1143.5	0	0	0	0	0	0	0
1144.5	0	0	0	0	0	0	0
1145.5	0	0	0	0	0	0	0
1146.5	0	0	0	0	0	0	0
1147.5	0	0	0	0	0	0	0
1148.5	0	0	0	0	0	0	0
1149.5	0	0	0	0	0	0	0
1150.5	0	0	0	0	0	0	0
1151.5	0	0	0	0	0	0	0
1152.5	0	0	0	0	0	0	0
1153.5	0	0	0	0	0	0	0
1154.5	0	0	0	0	0	0	0
1155.5	0	0	0	0	0	0	0
1156.5	0	0	0	0	0	0	0
1157.5	0	0	0	0	0	0	0
1158.5	0	0	0	0	0	0	0
1159.5	0	0	0	0	0	0	0
1160.5	0	0	0	0	0	0	0
1161.5	0	0	0	0	0	0	0
1162.5	0	0	0	0	0	0	0
1163.5	0	0	0	0	0	0	0
1164.5	0	0	0	0	0	0	0
1165.5	0	0	0	0	0	0	0
1166.5	0	0	0	0	0	0	0
1167.5	0	0	0	0	0	0	0
1168.5	0	0	0	0	0	0	0
1169.5	0	0	0	0	0	0	0
1170.5	0	0	0	0	0	0	0
1171.5	0	0	0	0	0	0	0
1172.5	0	0	0	0	0	0	0
1173.5	0	0	0	0	0	0	0
1174.5	0	0	0	0	0	0	0
1175.5	0	0	0	0	0	0	0
1176.5	0	0	0	0	0	0	0
1177.5	0	0	0	0	0	0	0
1178.5	0	0	0	0	0	0	0
1179.5	0	0	0	0	0	0	0
1180.5	0	0	0	0	0	0	0
1181.5	0	0	0	0	0	0	0
1182.5	0	0	0	0	0	0	0
1183.5	0	0	0	0	0	0	0
1184.5	0	0	0	0	0	0	0
1185.5	0	0	0	0	0	0	0
1186.5	0	0	0	0	0	0	0
1187.5	0	0	0	0	0	0	0
1188.5	0	0	0	0	0	0	0
1189.5	0	0	0	0	0	0	0
1190.5	0	0	0	0	0	0	0
1191.5	0	0	0	0	0	0	0
1192.5	0	0	0	0	0	0	0
1193.5	0	0	0	0	0	0	0
1194.5	0	0	0	0	0	0	0
1195.5	0	0	0	0	0	0	0
1196.5	0	0	0	0	0	0	0
1197.5	0	0	0	0	0	0	0
1198.5	0	0	0	0	0	0	0
1199.5	0	0	0	0	0	0	0
1200.5	0	0	0	0	0	0	0
1201.5	0	0	0	0	0	0	0
1202.5	0	0	0	0	0	0	0
1203.5	0	0	0	0	0	0	0
1204.5	0	0	0	0	0	0	0
1205.5	0	0	0	0	0	0	0
1206.5	0	0	0	0	0	0	0
1207.5	0	0	0	0	0	0	0
1208.5	0	0	0	0	0	0	0
1209.5	0	0	0	0	0	0	0
1210.5	0	0	0	0	0	0	0
1211.5	0	0	0	0	0	0	0
1212.5	0	0	0	0	0	0	0
1213.5	0	0	0	0	0	0	0
1214.5	0	0	0	0	0	0	0
1215.5	0	0	0	0	0	0	0
1216.5	0	0	0	0	0	0	0
1217.5	0	0	0	0	0	0	0
1218.5	0	0	0	0	0	0	0
1219.5	0	0	0	0	0	0	0
1220.5	0	0	0	0	0	0	0
1221.5	0	0	0	0	0	0	0
1222.5	0	0	0	0	0	0	0
1223.5	0	0	0	0	0	0	0
1224.5	0	0	0	0	0	0	0
1225.5	0	0	0	0	0	0	0
1226.5	0	0	0	0	0	0	0
1227.5	0	0	0	0	0	0	0
1228.5	0	0	0	0	0	0	0
1229.5	0	0	0	0	0	0	0
1230.5	0	0	0	0	0	0	0
1231.5	0	0	0	0	0	0	0
1232.5	0	0	0	0	0	0	0
1233.5	0	0	0	0	0	0	0
1234.5	0	0	0	0	0	0	0
1235.5	0	0	0	0	0	0	0
1236.5	0	0	0	0	0	0	0
1237.5	0	0	0	0	0	0	0
1238.5	0	0	0	0	0	0	0
1239.5	0	0	0	0	0	0	0
1240.5	0	0	0	0	0	0	0
1241.5	0	0	0	0	0	0	0
1242.5	0	0	0	0	0	0	0
1243.5	0	0	0	0	0	0	0
1244.5	0	0	0	0	0	0	0
1245.5	0	0	0	0	0	0	0
1246.5	0	0	0	0	0	0	0
1247.5	0	0	0	0	0	0	0
1248.5	0	0	0	0	0	0	0
1249.5	0	0	0	0	0	0	0
1250.5	0	0	0	0	0	0	0
1251.5	0	0	0	0	0	0	0
1252.5	0	0	0	0	0	0	0
1253.5	0	0	0	0	0	0	0
1254.5	0	0	0	0	0	0	0
1255.5	0	0	0	0	0	0	0
1256.5	0	0	0	0	0	0	0
1257.5	0	0	0	0	0	0	0
1258.5	0	0	0	0	0	0	0
1259.5	0	0	0	0	0	0	0
1260.5	0	0	0	0	0	0	0
1261.5	0	0	0	0	0	0	0
1262.5	0	0	0	0	0	0	0
1263.5	0	0	0	0	0	0	0
1264.5	0	0	0	0	0	0	0
1265.5	0	0	0	0	0	0	0
1266.5	0	0	0	0	0	0	0
1267.5	0	0	0	0	0	0	0
1268.5	0	0	0	0	0	0	0
1269.5	0	0	0	0	0	0	0
1270.5	0	0	0	0	0	0	0
1271.5	0	0	0	0	0	0	0
1272.5	0	0	0	0	0	0	0
1273.5	0	0	0	0	0	0	0
1274.5	0	0	0	0	0	0	0
1275.5	0	0	0	0	0	0	0
1276.5	0	0	0	0	0	0	0
1277.5	0	0	0	0	0	0	0
1278.5	0	0	0	0	0	0	0
1279.5	0	0	0	0	0	0	0
1280.5	0	0	0	0	0	0	0
1281.5	0	0	0	0	0	0	0
1282.5	0	0	0	0	0	0	0
1283.5	0	0	0	0	0	0	0
1284.5	0	0	0	0	0	0	0
1285.5	0	0	0	0	0	0	0
1286.5	0	0	0	0	0	0	0
1287.5	0	0	0	0	0	0	0
1288.5	0	0	0	0	0	0	0
1289.5	0	0	0	0	0	0	0
1290.5	0	0	0	0	0	0	0
1291.5	0	0	0	0	0	0	0
1292.5	0	0	0	0	0	0	0
1293.5	0	0	0	0	0	0	0
1294.5	0	0	0	0	0	0	0
1295.5	0	0	0	0	0	0	0
1296.5	0	0	0	0	0	0	0
1297.5	0	0	0	0	0	0	0
1298.5	0	0	0	0	0	0	0
1299.5	0	0	0	0	0	0	0
1300.5	0	0	0	0	0	0	0
1301.5	0	0	0	0	0	0	0
1302.5	0	0	0	0	0	0	0
1303.5	0	0	0	0	0	0	0
1304.5	0	0	0	0	0	0	0
1305.5	0	0	0	0	0	0	0
1306.5	0	0	0	0	0	0	0
1307.5	0	0	0	0	0	0	0
1308.5	0	0	0	0	0	0	0
1309.5	0	0	0	0	0	0	0
1310.5	0	0	0	0	0	0	0
1311.5	0	0	0	0	0	0	0
1312.5	0	0	0	0	0	0	0
1313.5	0	0	0	0	0	0	0
1314.5	0	0	0	0	0	0	0
1315.5	0	0	0	0	0	0	0
1316.5	0	0	0	0	0	0	0
1317.5	0	0	0	0	0	0	0
1318.5	0	0	0	0	0	0	0
1319.5	0	0	0	0	0	0	0
1320.5	0	0	0	0	0	0	0
1321.5	0	0	0	0	0	0	0
1322.5	0	0	0	0	0	0	0
1323.5	0	0	0	0	0	0	0
1324.5	0	0	0	0	0	0	0
1325.5	0	0	0	0	0	0	0
1326.5	0	0	0	0	0	0	0
1327.5	0	0	0	0	0	0	0
1328.5	0	0	0	0	0	0	0
1329.5	0	0	0	0	0	0	0
1330.5	0	0	0	0	0	0	0
1331.5	0	0	0	0	0	0	0
1332.5	0	0	0	0	0	0	0
1333.5	0	0	0	0	0	0	0
1334.5	0	0	0	0	0	0	0
1335.5	0	0	0	0	0	0	0
1336.5	0	0	0	0	0	0	0
1337.5	0	0	0	0	0	0	0
1338.5	0	0	0	0	0	0	0
1339.5	0	0	0	0	0	0	0
1340.5	0	0	0	0	0	0	0
1341.5	0	0	0	0	0	0	0
1342.5	0	0	0	0	0	0	0
1343.5	0	0	0	0	0	0	0
1344.5	0	0	0	0	0	0	0
1345.5	0	0	0	0	0	0	0
1346.5	0	0	0	0	0	0	0
1347.5	0	0	0	0	0	0	0
1348.5	0	0	0	0	0	0	0
1349.5	0	0	0	0	0	0	0
1350.5	0	0	0	0	0	0	0
1351.5	0	0	0	0	0	0	0
1352.5	0	0	0	0	0	0	0
1353.5	0	0	0	0	0	0	0
1354.5	0	0	0	0	0	0	0
1355.5	0	0	0	0	0	0	0
1356.5	0	0	0	0	0	0	0
1357.5	0	0	0	0	0	0	0
1358.5	0	0	0	0	0	0	0
1359.5	0	0	0	0	0	0	0
1360.5	0	0	0	0	0	0	0
1361.5	0	0	0	0	0	0	0
1362.5	0	0	0	0	0	0	0
1363.5	0	0	0	0	0	0	0
1364.5	0	0	0	0	0	0	0
1365.5	0	0	0	0	0	0	0
1366.5	0	0	0	0	0	0	0
1367.5	0	0	0	0	0	0	0
1368.5	0	0	0	0	0	0	0
1369.5	0	0	0	0	0	0	0
1370.5	0	0	0	0	0	0	0
1371.5	0	0	0	0	0	0	0
1372.5	0	0	0	0	0	0	0
1373.5	0	0	0	0	0	0	0
1374.5	0	0	0	0	0	0	0
1375.5	0	0	0	0	0	0	0
1376.5	0	0	0	0	0	0	0
1377.5	0	0	0	0	0	0	0
1378.5	0	0	0	0	0	0	0
1379.5	0	0	0	0	0	0	0
1380.5	0	0	0	0	0	0	0
1381.5	0	0	0	0	0	0	0
1382.5	0	0	0	0	0	0	0
1383.5	0	0	0	0	0	0	0
1384.5	0	0	0	0	0	0	0
1385.5	0	0	0	0	0	0	0
1386.5	0	0	0	0	0	0	0
1387.5	0	0	0	0	0	0	0
1388.5	0	0	0	0	0	0	0
1389.5	0	0	0	0	0	0	0
1390.5	0	0	0	0	0	0	0
1391.5	0	0	0	0	0	0	0
1392.5	0	0	0	0	0	0	0
1393.5	0	0	0	0	0	0	0
1394.5	0	0	0	0	0	0	0
1395.5	0	0	0	0	0	0	0
1396.5	0	0	0	0	0	0	0
1397.5	0	0	0	0	0	0	0
1398.5	0	0	0	0	0	0	0
1399.5	0	0	0	0	0	0	0
1400.5	0	0	0	0	0	0	0
1401.5	0	0	0	0	0	0	0
1402.5	0	0	0	0	0	0	0
1403.5	0	0	0	0	0	0	0
1404.5	0	0	0	0	0	0	0
1405.5	0	0	0	0	0	0	0
1406.5	0	0	0	0	0	0	0
1407.5	0	0	0	0	0	0	0
1408.5	0	0	0	0	0	0	0
1409.5	0	0	0	0	0	0	0
1410.5	0	0	0	0	0	0	0
1411.5	0	0	0	0	0	0	0
1412.5	0	0	0	0	0	0	0
1413.5	0	0	0	0	0	0	0
1414.5	0	0	0	0	0	0	0
1415.5	0	0	0	0	0	0	0
1416.5	0	0	0	0	0	0	0
1417.5	0	0	0	0	0	0	0
1418.5	0	0	0	0	0	0	0
1419.5	0	0	0	0	0	0	0
1420.5	0	0	0	0	0	0	0
1421.5	0	0	0	0	0	0	0
1422.5	0	0	0	0	0	0	0
1423.5	0	0	0	0	0	0	0
1424.5	0	0	0	0	0	0	0
1425.5	0	0	0	0	0	0	0
1426.5	0	0	0	0	0	0	0
1427.5	0	0	0	0	0	0	0
1428.5	0	0	0	0	0	0	0
1429.5	0	0	0	0	0	0	0
1430.5	0	0	0	0	0	0	0
1431.5	0	0	0	0	0	0	0
1432.5	0	0	0	0	0	0	0
1433.5	0	0	0	0	0	0	0
1434.5	0	0	0	0	0	0	0
1435.5	0	0	0	0	0	0	0
1436.5	0	0	0	0	0	0	0
1437.5	0	0	0	0	0	0	0
1438.5	0	0	0	0	0	0	0
1439.5	0	0	0	0	0	0	0
1440.5	0	0	0	0	0	0	0
1441.5	0	0	0	0	0	0	0
1442.5	0	0	0	0	0	0	0
1443.5	0	0	0	0	0	0	0
1444.5	0	0	0	0	0	0	0
1445.5	0	0	0	0	0	0	0
1446.5	0	0	0	0	0	0	0
1447.5	0	0	0	0	0	0	0
1448.5	0	0	0	0	0	0	0
1449.5	0	0	0	0	0	0	0
1450.5	0	0	0	0	0	0	0
1451.5	0	0	0	0	0	0	0
1452.5	0	0	0	0	0	0	0
1453.5	0	0	0	0	0	0	0
1454.5	0	0	0	0	0	0	0
1455.5	0	0	0	0	0	0	0
1456.5	0	0	0	0	0	0	0
1457.5	0	0	0	0	0	0	0
1458.5	0	0	0	0	0	0	0
1459.5	0	0	0	0	0	0	0
1460.5	0	0	0	0	0	0	0
1461.5	0	0	0	0	0	0	0
1462.5	0	0	0	0	0	0	0
1463.5	0	0	0	0	0	0	0
1464.5	0	0	0	0	0	0	0
1465.5	0	0	0	0	0	0	0
1466.5	0	0	0	0	0	0	0
1467.5	0	0	0	0	0	0	0
1468.5	0	0	0	0	0	0	0
1469.5	0	0	0	0	0	0	0
1470.5	0	0	0	0	0	0	0
1471.5	0	0	0	0	0	0	0
1472.5	0	0	0	0	0	0	0
1473.5	0	0	0	0	0	0	0
1474.5	0	0	0	0	0	0	0
1475.5	0	0	0	0	0	0	0
1476.5	0	0	0	0	0	0	0
1477.5	0	0	0	0	0	0	0
1478.5	0	0	0	0	0	0	0
1479.5	0	0	0	0	0	0	0
1480.5	0	0	0	0	0	0	0
1481.5	0	0	0	0	0	0	0
1482.5	0	0	0	0	0	0	0
1483.5	0	0	0	0	0	0	0
1484.5	0	0	0	0	0	0	0
1485.5	0	0	0	0	0	0	0
1486.5	0	0	0	0	0	0	0
1487.5	0	0	0	0	0	0	0
1488.5	0	0	0	0	0	0	0
1489.5	0	0	0	0	0	0	0
1490.5	0	0	0	0	0	0	0
1491.5	0	0	0	0	0	0	0
1492.5	0	0	0	0	0	0	0
1493.5	0	0	0	0	0	0	0
1494.5	0	0	0	0	0	0	0
1495.5	0	0	0	0	0	0	0
1496.5	0	0	0	0	0	0	0
1497.5	0	0	0	0	0	0	0
1498.5	0	0	0	0	0	0	0
1499.5	0	0	0	0	0	0	0
1500.5	0	0	0	0	0	0	0
1501.5	0	0	0	0	0	0	0
1502.5	0	0	0	0	0	0	0
1503.5	0	0	0	0	0	0	0
1504.5	0	0	0	0	0	0	0
1505.5	0	0	0	0	0	0	0
1506.5	0	0	0	0	0	0	0
1507.5	0	0	0	0	0	0	0
1508.5	0	0	0	0	0	0	0
1509.5	0	0	0	0	0	0	0
1510.5	0	0	0	0	0	0	0
1511.5	0	0	0	0	0	0	0
1512.5	0	0	0	0	0	0	0
1513.5	0	0	0	0	0	0	0
1514.5	0	0	0	0	0	0	0
1515.5	0	0	0	0	0	0	0
1516.5	0	0	0	0	0	0	0
1517.5	0	0	0	0	0	0	0
1518.5	0	0	0	0	0	0	0
1519.5	0	0	0	0	0	0	0
1520.5	0	0	0	0	0	0	0
1521.5	0	0	0	0	0	0	0
1522.5	0	0	0	0	0	0	0
1523.5	0	0	0	0	0	0	0
1524.5	0	0	0	0	0	0	0
1525.5	0	0	0	0	0	0	0
1526.5	0	0	0	0	0	0	0
1527.5	0	0	0	0	0	0	0
1528.5	0	0	0	0	0	0	0
1529.5	0	0	0	0	0	0	0
1530.5	0	0	0	0	0	0	0
1531.5	0	0	0	0	0	0	0
1532.5	0	0	0	0	0	0	0
1533.5	0	0	0	0	0	0	0
1534.5	0	0	0	0	0	0	0
1535.5	0	0	0	0	0	0	0
1536.5	0	0	0	0	0	0	0
1537.5	0	0	0	0	0	0	0
1538.5	0	0	0	0	0	0	0
1539.5	0	0	0	0	0	0	0
1540.5	0	0	0	0	0	0	0
1541.5	0	0	0	0	0	0	0
1542.5	0	0	0	0	0	0	0
1543.5	0	0	0	0	0	0	0
1544.5	0	0	0	0	0	0	0
1545.5	0	0	0	0	0	0	0
1546.5	0	0	0	0	0	0	0
1547.5	0	0	0	0	0	0	0
1548.5	0	0	0	0	0	0	0
1549.5	0	0	0	0	0	0	0
1550.5	0	0	0	0	0	0	0
1551.5	0	0	0	0	0	0	0
1552.5	0	0	0	0	0	0	0
1553.5	0	0	0	0	0	0	0
1554.5	0	0	0	0	0	0	0
1555.5	0	0	0	0	0	0	0
1556.5	0	0	0	0	0	0	0
1557.5	0	0	0	0	0	0	0
1558.5	0	0	0	0	0	0	0
1559.5	0	0	0	0	0	0	0
1560.5	0	0	0	0	0	0	0
1561.5	0	0	0	0	0	0	0
1562.5	0	0	0	0	0	0	0
1563.5	0	0	0	0	0	0	0
1564.5	0	0	0	0	0	0	0
1565.5	0	0	0	0	0	0	0
1566.5	0	0	0	0	0	0	0
1567.5	0	0	0	0	0	0	0
1568.5	0	0	0	0	0	0	0
1569.5	0	0	0	0	0	0	0
1570.5	0	0	0	0	0	0	0
1571.5	0	0	0	0	0	0	0
1572.5	0	0	0	0	0	0	0
1573.5	0	0	0	0	0	0	0
1574.5	0	0	0	0	0	0	0
1575.5	0	0	0	0	0	0	0
1576.5	0	0	0	0	0	0	0
1577.5	0	0	0	0	0	0	0
1578.5	0	0	0	0	0	0	0
1579.5	0	0	0	0	0	0	0
1580.5	0	0	0	0	0	0	0
1581.5	0	0	0	0	0	0	0
1582.5	0	0	0	0	0	0	0
1583.5	0	0	0	0	0	0	0
1584.5	0	0	0	0	0	0	0
1585.5	0	0	0	0	0	0	0
1586.5	0	0	0	0	0	0	0
1587.5	0	0	0	0	0	0	0
1588.5	0	0	0	0	0	0	0
1589.5	0	0	0	0	0	0	0
1590.5	0	0	0	0	0	0	0
1591.5	0	0	0	0	0	0	0
1592.5	0	0	0	0	0	0	0
1593.5	0	0	0	0	0	0	0
1594.5	0	0	0	0	0	0	0
1595.5	0	0	0	0	0	0	0
1596.5	0	0	0	0	0	0	0
1597.5	0	0	0	0	0	0	0
1598.5	0	0	0	0	0	0	0
1599.5	0	0	0	0	0	0	0
1600.5	0	0	0	0	0	0	0
1601.5	0	0	0	0	0	0	0
1602.5	0	0	0	0	0	0	0
1603.5	0	0	0	0	0	0	0
1604.5	0	0	0	0	0	0	0
1605.5	0	0	0	0	0	0	0
1606.5	0	0	0	0	0	0	0
1607.5	0	0	0	0	0	0	0
1608.5	0	0	0	0	0	0	0
1609.5	0	0	0	0	0	0	0
1610.5	0	0	0	0	0	0	0
1611.5	0	0	0	0	0	0	0
1612.5	0	0	0	0	0	0	0
1613.5	0	0	0	0	0	0	0
1614.5	0	0	0	0	0	0	0
1615.5	0	0	0	0	0	0	0
1616.5	0	0	0	0	0	0	0
1617.5	0	0	0	0	0	0	0
1618.5	0	0	0	0	0	0	0
1619.5	0	0	0	0	0	0	0
1620.5	0	0	0	0	0	0	0
1621.5	0	0	0	0	0	0	0
1622.5	0	0	0	0	0	0	0
1623.5	0	0	0	0	0	0	0
1624.5	0	0	0	0	0	0	0
1625.5	0	0	0	0	0	0	0
1626.5	0	0	0	0	0	0	0
1627.5	0	0	0	0	0	0	0
1628.5	0	0	0	0	0	0	0
1629.5	0	0	0	0	0	0	0
1630.5	0	0	0	0	0	0	0
1631.5	0	0	0	0	0	0	0
1632.5	0	0	0	0	0	0	0
1633.5	0	0	0	0	0	0	0
1634.5	0	0	0	0	0	0	0
1635.5	0	0	0	0	0	0	0
1636.5	0	0	0	0	0	0	0
1637.5	0	0	0	0	0	0	0
1638.5	0	0	0	0	0	0	0
1639.5	0	0	0	0	0	0	0
1640.5	0	0	0	0	0	0	0
1641.5	0	0	0	0	0	0	0
1642.5	0	0	0	0	0	0	0
1643.5	0	0	0	0	0	0	0
1644.5	0	0	0	0	0	0	0
1645.5	0	0	0	0	0	0	0
1646.5	0	0	0	0	0	0	0
1647.5	0	0	0	0	0	0	0
1648.5	0	0	0	0	0	0	0
1649.5	0	0	0	0	0	0	0
1650.5	0	0	0	0	0	0	0
1651.5	0	0	0	0	0	0	0
1652.5	0	0	0	0	0	0	0
1653.5	0	0	0	0	0	0	0
1654.5	0	0	0	0	0	0	0
1655.5	0	0	0	0	0	0	0
1656.5	0	0	0	0	0	0	0
1657.5	0	0	0	0	0	0	0
1658.5	0	0	0	0	0	0	0
1659.5	0	0	0	0	0	0	0
1660.5	0	0	0	0	0	0	0
1661.5	0	0	0	0	0	0	0
1662.5	0	0	0	0	0	0	0
1663.5	0	0	0	0	0	0	0
1664.5	0	0	0	0	0	0	0
1665.5	0	0	0	0	0	0	0
1666.5	0	0	0	0	0	0	0
1667.5	0	0	0	0	0	0	0
1668.5	0	0	0	0	0	0	0
1669.5	0	0	0	0	0	0	0
1670.5	0	0	0	0	0	0	0
1671.5	0	0	0	0	0	0	0
1672.5	0	0	0	0	0	0	0
1673.5	0	0	0	0	0	0	0
1674.5	0	0	0	0	0	0	0
1675.5	0	0	0	0	0	0	0
1676.5	0	0	0	0	0	0	0
1677.5	0	0	0	0	0	0	0
1678.5	0	0	0	0	0	0	0
1679.5	0	0	0	0	0	0	0
1680.5	0	0	0	0	0	0	0
1681.5	0	0	0	0	0	0	0
1682.5	0	0	0	0	0	0	0
1683.5	0	0	0	0	0	0	0
1684.5	0	0	0	0	0	0	0
1685.5	0	0	0	0	0	0	0
1686.5	0	0	0	0	0	0	0
1687.5	0	0	0	0	0	0	0
1688.5	0	0	0	0	0	0	0
1689.5	0	0	0	0	0	0	0
1690.5	0	0	0	0	0	0	0
1691.5	0	0	0	0	0	0	0
1692.5	0	0	0	0	0	0	0
1693.5	0	0	0	0	0	0	0
1694.5	0	0	0	0	0	0	0
1695.5	0	0	0	0	0	0	0
1696.5	0	0	0	0	0	0	0
1697.5	0	0	0	0	0	0	0
1698.5	0	0	0	0	0	0	0
1699.5	0	0	0	0	0	0	0
1700.5	0	0	0	0	0	0	0
1701.5	0	0	0	0	0	0	0
1702.5	0	0	0	0	0	0	0
1703.5	0	0	0	0	0	0	0
1704.5	0	0	0	0	0	0	0
1705.5	0	0	0	0	0	0	0
1706.5	0	0	0	0	0	0	0
1707.5	0	0	0	0	0	0	0
1708.5	0	0	0	0	0	0	0
1709.5	0	0	0	0	0	0	0
1710.5	0	0	0	0	0	0	0
1711.5	0	0	0	0	0	0	0
1712.5	0	0	0	0	0	0	0
1713.5	0	0	0	0	0	0	0
1714.5	0	0	0	0	0	0	0
1715.5	0	0	0	0	0	0	0
1716.5	0	0	0	0	0	0	0
1717.5	0	0	0	0	0	0	0
1718.5	0	0	0	0	0	0	0
1719.5	0	0	0	0	0	0	0
1720.5	0	0	0	0	0	0	0
1721.5	0	0	0	0	0	0	0
1722.5	0	0	0	0	0	0	0
1723.5	0	0	0	0	0	0	0
1724.5	0	0	0	0	0	0	0
1725.5	0	0	0	0	0	0	0
1726.5	0	0	0	0	0	0	0
1727.5	0	0	0	0	0	0	0
1728.5	0	0	0	0	0	0	0
1729.5	0	0	0	0	0	0	0
1730.5	0	0	0	0	0	0	0
1731.5	0	0	0	0	0	0	0
1732.5	0	0	0	0	0	0	0
1733.5	0	0	0	0	0	0	0
1734.5	0	0	0	0	0	0	0
1735.5	0	0	0	0	0	0	0
1736.5	0	0	0	0	0	0	0
1737.5	0	0	0	0	0	0	0
1738.5	0	0	0	0	0	0	0
1739.5	0	0	0	0	0	0	0
1740.5	0	0	0	0	0	0	0
1741.5	0	0	0	0	0	0	0
1742.5	0	0	0	0	0	0	0
1743.5	0	0	0	0	0	0	0
1744.5	0	0	0	0	0	0	0
1745.5	0	0	0	0	0	0	0
1746.5	0	0	0	0	0	0	0
1747.5	0	0	0	0	0	0	0
1748.5	0	0	0	0	0	0	0
1749.5	0	0	0	0	0	0	0
1750.5	0	0	0	0	0	0	0
1751.5	0	0	0	0	0	0	0
1752.5	0	0	0	0	0	0	0
1753.5	0	0	0	0	0	0	0
1754.5	0	0	0	0	0	0	0
1755.5	0	0	0	0	0	0	0
1756.5	0	0	0	0	0	0	0
1757.5	0	0	0	0	0	0	0
1758.5	0	0	0	0	0	0	0
1759.5	0	0	0	0	0	0	0
1760.5	0	0	0	0	0	0	0
1761.5	0	0	0	0	0	0	0
1762.5	0	0	0	0	0	0	0
1763.5	0	0	0	0	0	0	0
1764.5	0	0	0	0	0	0	0
1765.5	0	0	0	0	0	0	0
1766.5	0	0	0	0	0	0	0
1767.5	0	0	0	0	0	0	0
1768.5	0	0	0	0	0	0	0
1769.5	0	0	0	0	0	0	0
1770.5	0	0	0	0	0	0	0
1771.5	0	0	0	0	0	0	0
1772.5	0	0	0	0	0	0	0
1773.5	0	0	0	0	0	0	0
1774.5	0	0	0	0	0	0	0
1775.5	0	0	0	0	0	0	0
1776.5	0	0	0	0	0	0	0
1777.5	0	0	0	0	0	0	0
1778.5	0	0	0	0	0	0	0
1779.5	0	0	0	0	0	0	0
1780.5	0	0	0	0	0	0	0
1781.5	0	0	0	0	0	0	0
1782.5	0	0	0	0	0	0	0
1783.5	0	0	0	0	0	0	0
1784.5	0	0	0	0	0	0	0
1785.5	0	0	0	0	0	0	0
1786.5	0	0	0	0	0	0	0
1787.5	0	0	0	0	0	0	0
1788.5	0	0	0	0	0	0	0
1789.5	0	0	0	0	0	0	0
1790.5	0	0	0	0	0	0	0
1791.5	0	0	0	0	0	0	0
1792.5	0	0	0	0	0	0	0
1793.5	0	0	0	0	0	0	0
1794.5	0	0	0	0	0	0	0
1795.5	0	0	0	0	0	0	0
1796.5	0	0	0	0	0	0	0
1797.5	0	0	0	0	0	0	0
1798.5	0	0	0	0	0	0	0
1799.5	0	0	0	0	0	0	0
1800.5	0	0	0	0	0	0	0
1801.5	0	0	0	0	0	0	0
1802.5	0	0	0	0	0	0	0
1803.5	0	0	0	0	0	0	0
1804.5	0	0	0	0	0	0	0
1805.5	0	0	0	0	0	0	0
1806.5	0	0	0	0	0	0	0
1807.5	0	0	0	0	0	0	0
1808.5	0	0	0	0	0	0	0
1809.5	0	0	0	0	0	0	0
1810.5	0	0	0	0	0	0	0
1811.5	0	0	0	0	0	0	0
1812.5	0	0	0	0	0	0	0
1813.5	0	0	0	0	0	0	0
1814.5	0	0	0	0	0	0	0
1815.5	0	0	0	0	0	0	0
1816.5	0	0	0	0	0	0	0
1817.5	0	0	0	0	0	0	0
1818.5	0	0	0	0	0	0	0
1819.5	0	0	0	0	0	0	0
1820.5	0	0	0	0	0	0	0
1821.5	0	0	0	0	0	0	0
1822.5	0	0	0	0	0	0	0
1823.5	0	0	0	0	0	0	0
1824.5	0	0	0	0	0	0	0
1825.5	0	0	0	0	0	0	0
1826.5	0	0	0	0	0	0	0
1827.5	0	0	0	0	0	0	0
1828.5	0	0	0	0	0	0	0
1829.5	0	0	0	0	0	0	0
1830.5	0	0	0	0	0	0	0
1831.5	0	0	0	0	0	0	0
1832.5	0	0	0	0	0	0	0
1833.5	0	0	0	0	0	0	0
1834.5	0	0	0	0	0	0	0
1835.5	0	0	0	0	0	0	0
1836.5	0	0	0	0	0	0	0
1837.5	0	0	0	0	0	0	0
1838.5	0	0	0	0	0	0	0
1839.5	0	0	0	0	0	0	0
1840.5	0	0	0	0	0	0	0
1841.5	0	0	0	0	0	0	0
1842.5	0	0	0	0	0	0	0
1843.5	0	0	0	0	0	0	0
1844.5	0	0	0	0	0	0	0
1845.5	0	0	0	0	0	0	0
1846.5	0	0	0	0	0	0	0
1847.5	0	0	0	0	0	0	0
1848.5	0	0	0	0	0	0	0
1849.5	0	0	0	0	0	0	0
1850.5	0	0	0	0	0	0	0
1851.5	0	0	0	0	0	0	0
1852.5	0	0	0	0	0	0	0
1853.5	0	0	0	0	0	0	0
1854.5	0	0	0	0	0	0	0
1855.5	0	0	0	0	0	0	0
1856.5	0	0	0	0	0	0	0
1857.5	0	0	0	0	0	0	0
1858.5	0	0	0	0	0	0	0
1859.5	0	0	0	0	0	0	0
1860.5	0	0	0	0	0	0	0
1861.5	0	0	0	0	0	0	0
1862.5	0	0	0	0	0	0	0
1863.5	0	0	0	0	0	0	0
1864.5	0	0	0	0	0	0	0
1865.5	0	0	0	0	0	0	0
1866.5	0	0	0	0	0	0	0
1867.5	0	0	0	0	0	0	0
1868.5	0	0	0	0	0	0	0
1869.5	0	0	0	0	0	0	0
1870.5	0	0	0	0	0	0	0
1871.5	0	0	0	0	0	0	0
1872.5	0	0	0	0	0	0	0
1873.5	0	0	0	0	0	0	0
1874.5	0	0	0	0	0	0	0
1875.5	0	0	0	0	0	0	0
1876.5	0	0	0	0	0	0	0
1877.5	0	0	0	0	0	0	0
1878.5	0	0	0	0	0	0	0
1879.5	0	0	0	0	0	0	0
1880.5	0	0	0	0	0	0	0
1881.5	0	0	0	0	0	0	0
1882.5	0	0	0	0	0	0	0
1883.5	0	0	0	0	0	0	0
1884.5	0	0	0	0	0	0	0
1885.5	0	0	0	0	0	0	0
1886.5	0	0	0	0	0	0	0
1887.5	0	0	0	0	0	0	0
1888.5	0	0	0	0	0	0	0
1889.5	0	0	0	0	0	0	0
1890.5	0	0	0	0	0	0	0
1891.5	0	0	0	0	0	0	0
1892.5	0	0	0	0	0	0	0
1893.5	0	0	0	0	0	0	0
1894.5	0	0	0	0	0	0	0
1895.5	0	0	0	0	0	0	0
1896.5	0	0	0	0	0	0	0
1897.5	0	0	0	0	0	0	0
1898.5	0	0	0	0	0	0	0
1899.5	0	0	0	0	0	0	0
1900.5	0	0	0	0	0	0	0
1901.5	0	0	0	0	0	0	0
1902.5	0	0	0	0	0	0	0
1903.5	0	0	0	0	0	0	0
1904.5	0	0	0	0	0	0	0
1905.5	0	0	0	0	0	0	0
1906.5	0	0	0	0	0	0	0
1907.5	0	0	0	0	0	0	0
1908.5	0	0	0	0	0	0	0
1909.5	0	0	0	0	0	0	0
1910.5	0	0	0	0	0	0	0
1911.5	0	0	0	0	0	0	0
1912.5	0	0	0	0	0	0	0
1913.5	0	0	0	0	0	0	0
1914.5	0	0	0	0	0	0	0
1915.5	0	0	0	0	0	0	0
1916.5	0	0	0	0	0	0	0
1917.5	0	0	0	0	0	0	0
1918.5	0	0	0	0	0	0	0
1919.5	0	0	0	0	0	0	0
1920.5	0	0	0	0	0	0	0
1921.5	0	0	0	0	0	0	0
1922.5	0	0	0	0	0	0	0
1923.5	0	0	0	0	0	0	0
1924.5	0	0	0	0	0	0	0
1925.5	0	0	0	0	0	0	0
[truncated: 7,743 more rows]
